# Supplementary material for: Dominant negative variants in KIF5B cause osteogenesis imperfecta via down regulation of mTOR signaling
Source: PubMed Central journal article supplement (PMC10656020; doi:10.1371/journal.pgen.1011005), 2023-11-07
Supplement: pgen.1011005.s008.pdf [file pgen.1011005.s008.pdf]

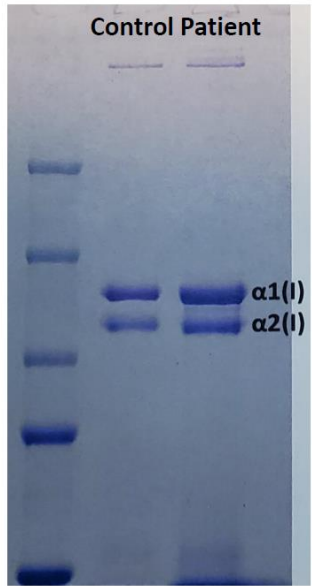

|                | <b>P986-3Hyp</b> |
|----------------|------------------|
| <b>Control</b> | 98%              |
| <b>Patient</b> | 98%              |

**S1 Fig. Collagen post-translational modification is not altered in Proband 1.** Type I collagen isolated from patient fibroblasts showed no difference in electrophoretic migration pattern between patient and control. Mass spectrometry analysis showed no difference in hydroxylation pattern of 3-Hydroxyproline at P986 between patient and control.
