# Supplementary material for: Dominant negative variants in KIF5B cause osteogenesis imperfecta via down regulation of mTOR signaling
Source: PubMed Central journal article supplement (PMC10656020; doi:10.1371/journal.pgen.1011005), 2023-11-07
Supplement: pgen.1011005.s009.pdf [file pgen.1011005.s009.pdf]

The *C. elegans* ortholog of *KIF5B* is *unc-116*

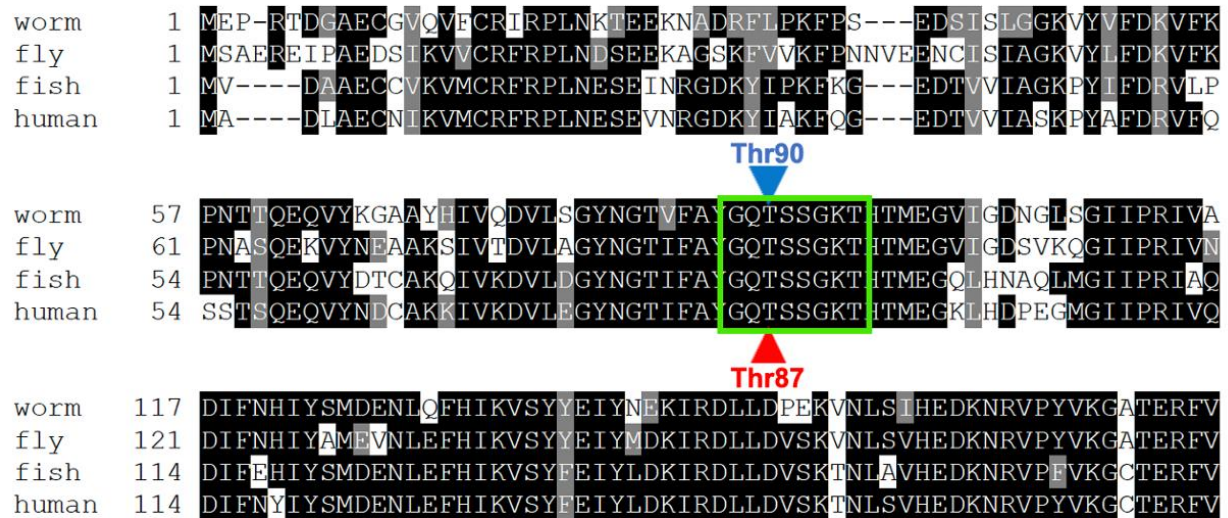

**S2 Fig. *KIF5B* P-loop nucleotide binding domain is highly conserved between species.**

Multiple sequence alignment of the N-terminal part of the motor domain of *KIF5B* and orthologs in other organisms. The highly conserved P-loop region of the ATP-binding domain is highlighted with a green box. The *KIF5B* p.Thr87Ile variant in proband 1 (red arrowhead) and corresponding *C. elegans* (worm) *unc-116* Thr90 residue (blue arrowhead) are shown.
