# Supplementary material for: Dominant negative variants in KIF5B cause osteogenesis imperfecta via down regulation of mTOR signaling
Source: PubMed Central journal article supplement (PMC10656020; doi:10.1371/journal.pgen.1011005), 2023-11-07
Supplement: pgen.1011005.s010.pdf [file pgen.1011005.s010.pdf]

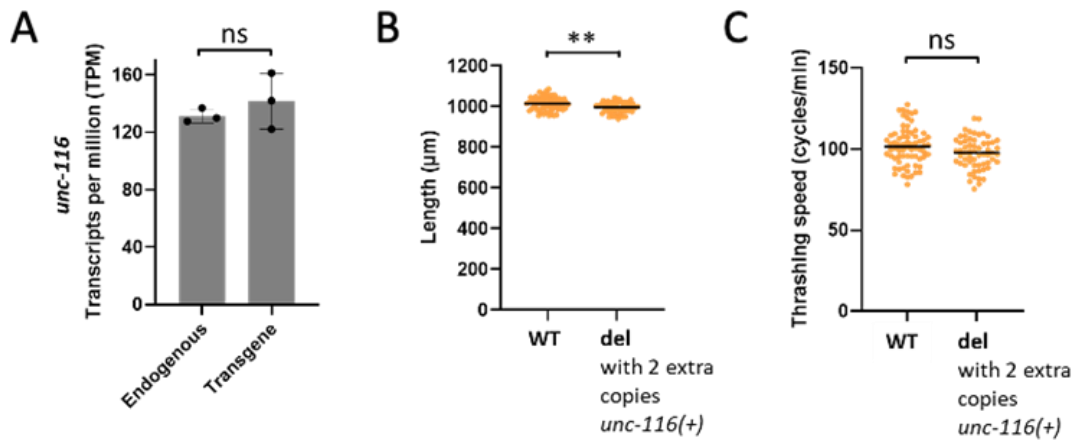

**S3 Fig. Single copy transgene of *unc-116(+)* is functional.** (A) RNA sequencing transcripts per million (TPM) of endogenous *unc-116* and *unc-116* transgene on chromosome II. Rescue of body length (B) and thrashing speed (C) defects were demonstrated upon introduction of two additional copies of *unc-116(+)* transgene into *unc-116 (del)*. The difference in length between wild type and *unc-116(del)* with 2 extra copies of *unc-116(+)* is less than 2% and while statistically different is not considered biologically significant. Student t-test was used for comparison; ns: not significant, \*\*p<0.001.
