# Supplementary material for: Dominant negative variants in KIF5B cause osteogenesis imperfecta via down regulation of mTOR signaling
Source: PubMed Central journal article supplement (PMC10656020; doi:10.1371/journal.pgen.1011005), 2023-11-07
Supplement: pgen.1011005.s011.pdf [file pgen.1011005.s011.pdf]

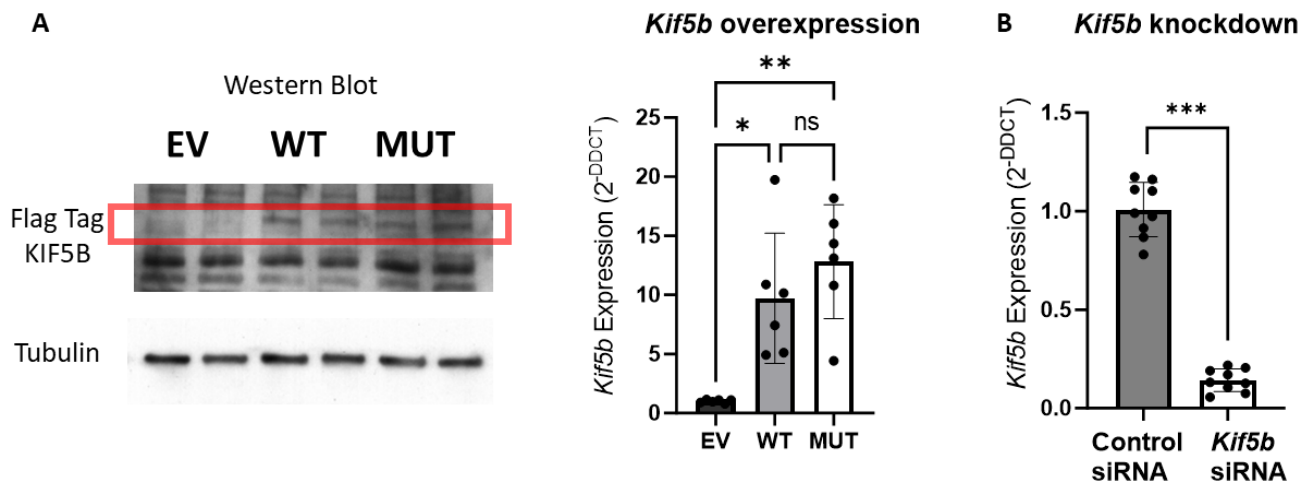

**S4\_Fig. *KIF5B* overexpression and knockdown in NIH3T3 cells.** (A) western blot analysis (left) and real time RT-PCR (right) showing overexpression of Flag-tagged wild type and mutant *KIF5B* in transiently transfected NIH3T3 cells (EV- empty vector, WT- wild type *KIF5B*, MUT- *KIF5B*<sup>T87I</sup>). (B) Real time RT-PCR showing efficient knock-down of *Kif5b* in NIH3T3 cells using siRNA. ns: not significant, \* $p < 0.01$ , \*\* $p < 0.001$ , \*\*\* $p < 0.0001$ .
