# Supplementary material for: Dominant negative variants in KIF5B cause osteogenesis imperfecta via down regulation of mTOR signaling
Source: PubMed Central journal article supplement (PMC10656020; doi:10.1371/journal.pgen.1011005), 2023-11-07
Supplement: pgen.1011005.s012.pdf [file pgen.1011005.s012.pdf]

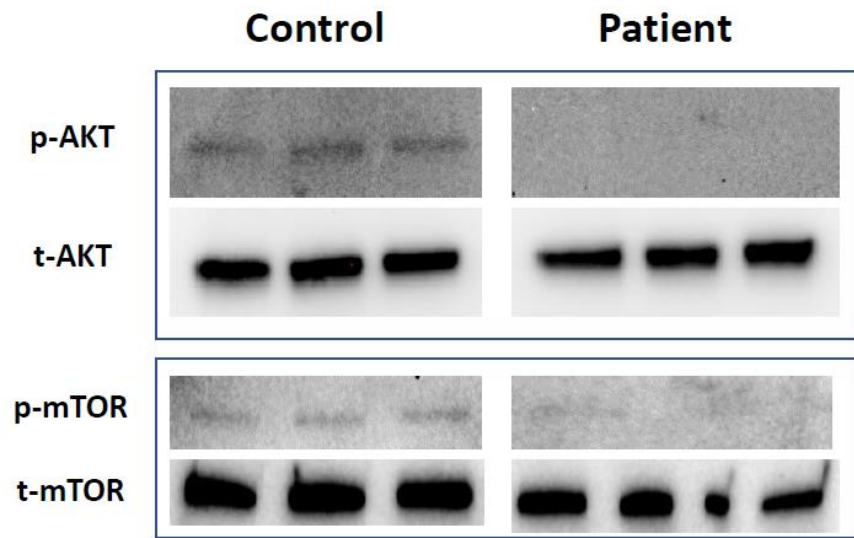

**S5 Fig. Reduced mTOR signaling in patient fibroblasts.** Western blot showing reduced phosphorylated AKT (top panel) and mTOR (bottom panel) in serum-starved patient fibroblasts.
