# Supplementary material for: Dominant negative variants in KIF5B cause osteogenesis imperfecta via down regulation of mTOR signaling
Source: PubMed Central journal article supplement (PMC10656020; doi:10.1371/journal.pgen.1011005), 2023-11-07
Supplement: pgen.1011005.s014.pdf [file pgen.1011005.s014.pdf]

**S2 Table. *unc-116* genome editing reagents**

|                      |                                                                                                          |
|----------------------|----------------------------------------------------------------------------------------------------------|
| crRNA                | GCATATGGACAAACATCTTC                                                                                     |
| T90I repair template | GATGTATTATCCGGTTATAATGGAACAGTTTTTGCATATGGACAAAtATCcagtGGAAAAACA<br>CATACAATGGAGgtaggaattatgaaaaccttgataa |
| T90T repair template | GATGTATTATCCGGTTATAATGGAACAGTTTTTGCATATGGACAAACATCcagtGGAAAAACA<br>CATACAATGGAGgtaggaattatgaaaaccttgataa |
| Primer 6932          | ATCCTGCAGGTGCCAATACATTCCTTGTATCCC                                                                        |
| Primer 6947          | ACCAACGCGTATGGAGAACAACCTTTAGACTAGag                                                                      |
