# Supplementary material for: Dominant negative variants in KIF5B cause osteogenesis imperfecta via down regulation of mTOR signaling
Source: PubMed Central journal article supplement (PMC10656020; doi:10.1371/journal.pgen.1011005), 2023-11-07
Supplement: pgen.1011005.s015.pdf [file pgen.1011005.s015.pdf]

## **Members of the Undiagnosed Diseases Network**

Maria T. Acosta

David R. Adams

Raquel L. Alvarez

Justin Alvey

Aimee Allworth

Ashley Andrews

Euan A. Ashley

Carlos A. Bacino

Guney Bademci

Ashok Balasubramanyam

Dustin Baldrige

Jim Bale

Michael Bamshad

Deborah Barbouth

Pinar Bayrak-Toydemir

Anita Beck

Alan H. Beggs

Edward Behrens

Gill Bejerano

Hugo J. Bellen

Jimmy Bennett

Jonathan A. Bernstein

Gerard T. Berry

Anna Bican

Stephanie Bivona

Elizabeth Blue

John Bohnsack

Devon Bonner

Lorenzo Botto

Lauren C. Briere  
Gabrielle Brown  
Elizabeth A. Burke  
Lindsay C. Burrage  
Manish J. Butte  
Peter Byers  
William E. Byrd  
John Carey  
Olveen Carrasquillo  
Thomas Cassini  
Ta Chen Peter Chang  
Sirisak Chanprasert  
Hsiao-Tuan Chao  
Ivan Chinn  
Gary D. Clark  
Terra R. Coakley  
Laurel A. Cobban  
Joy D. Cogan  
Matthew Coggins  
F. Sessions Cole  
Heather A. Colley  
Heidi Cope  
Rosario Corona  
William J. Craigen  
Andrew B. Crouse  
Michael Cunningham  
Precilla D'Souza  
Hongzheng Dai  
Surendra Dasari  
Joie Davis

Jyoti G. Dayal  
Esteban C. Dell'Angelica  
Katrina Dipple  
Daniel Doherty  
Naghmeh Dorrani  
Argenia L. Doss  
Emilie D. Douine  
Dawn Earl  
David J. Eckstein  
Lisa T. Emrick  
Christine M. Eng  
Marni Falk  
Elizabeth L. Fieg  
Paul G. Fisher  
Brent L. Fogel  
Irman Forghani  
William A. Gahl  
Ian Glass  
Bernadette Gochuico  
Page C. Goddard  
Rena A. Godfrey  
Alana Grajewski  
Don Hadley  
Meghan C. Halley  
Rizwan Hamid  
Kelly Hassey  
Nichole Hayes  
Frances High  
Anne Hing  
Fuki M. Hisama

Ingrid A. Holm

Jason Hom

Martha Horike-Pyne

Alden Huang

Sarah Hutchison

Wendy Introne

Rosario Isasi

Kosuke Izumi

Gail P. Jarvik

Jeffrey Jarvik

Suman Jayadev

Orpa Jean-Marie

Vaidehi Jobanputra

Emerald Kaitryn

Shamika Ketkar

Dana Kiley

Gonench Kilich

Shilpa N. Kobren

Isaac S. Kohane

Jennefer N. Kohler

Susan Korrick

Deborah Krakow

Donna M. Krasnewich

Elijah Kravets

Seema R. Lalani

Byron Lam

Christina Lam

Brendan C. Lanpher

Ian R. Lanza

Kimberly LeBlanc

Brendan H. Lee  
Roy Levitt  
Richard A. Lewis  
Pengfei Liu  
Xue Zhong Liu  
Nicola Longo  
Sandra K. Loo  
Joseph Loscalzo  
Richard L. Maas  
Ellen F. Macnamara  
Calum A. MacRae  
Valerie V. Maduro  
AudreyStephannie Maghiro  
Rachel Mahoney  
May Christine V. Malicdan  
Laura A. Mamounas  
Teri A. Manolio  
Rong Mao  
Ronit Marom  
Gabor Marth  
Beth A. Martin  
Martin G. Martin  
Julian A. Martínez-Agosto  
Shruti Marwaha  
Jacob McCauley  
Allyn McConkie-Rosell  
Alexa T. McCray  
Elisabeth McGee  
Matthew Might  
Danny Miller

Ghayda Mirzaa  
Eva Morava  
Paolo Moretti  
John J. Mulvihill  
Mariko Nakano-Okuno  
Stanley F. Nelson  
Shirley Nieves-Rodriguez  
Donna Novacic  
Devin Oglesbee  
James P. Orengo  
Laura Pace  
Stephen Pak  
J. Carl Pallais  
Christina G.S. Palmer  
Jeanette C. Papp  
Neil H. Parker  
John A. Phillips III  
Jennifer E. Posey  
Lorraine Potocki  
Barbara N. Pusey Swerdzewski  
Aaron Quinlan  
Deepak A. Rao  
Anna Raper  
Wendy Raskind  
Genecee Renteria  
Chloe M. Reuter  
Lynette Rives  
Amy K. Robertson  
Lance H. Rodan  
Jill A. Rosenfeld

Elizabeth Rosenthal  
Francis Rossignol  
Maura Ruzhnikov  
Ralph Sacco  
Jacinda B. Sampson  
Mario Saporta  
Judy Schaechter  
Timothy Schedl  
Kelly Schoch  
Daryl A. Scott  
Elaine Seto  
Vandana Shashi  
Emily Shelkowitz  
Sam Sheppeard  
Jimann Shin  
Edwin K. Silverman  
Janet S. Sinsheimer  
Kathy Sisco  
Edward C. Smith  
Kevin S. Smith  
Lilianna Solnica-Krezel  
Ben Solomon  
Rebecca C. Spillmann  
Andrew Stergachis  
Joan M. Stoler  
Kathleen Sullivan  
Jennifer A. Sullivan  
Shirley Sutton  
David A. Sweetser  
Virginia Sybert

Holly K. Tabor  
Queenie K.-G. Tan  
Amelia L. M. Tan  
Arjun Tarakad  
Mustafa Tekin  
Fred Telischi  
Willa Thorson  
Cynthia J. Tifft  
Camilo Toro  
Alyssa A. Tran  
Rachel A. Ungar  
Tiina K. Urv  
Adeline Vanderver  
Matt Velinder  
Dave Viskochil  
Tiphonie P. Vogel  
Colleen E. Wahl  
Melissa Walker  
Nicole M. Walley  
Jennifer Wambach  
Jijun Wan  
Lee-kai Wang  
Michael F. Wangler  
Patricia A. Ward  
Daniel Wegner  
Monika Weisz Hubshman  
Mark Wener  
Tara Wenger  
Monte Westerfield  
Matthew T. Wheeler

Jordan Whitlock

Lynne A. Wolfe

Kim Worley

Changrui Xiao

Shinya Yamamoto

John Yang

Zhe Zhang

Stephan Zuchner
