# Supplementary material for: Dominant negative variants in KIF5B cause osteogenesis imperfecta via down regulation of mTOR signaling
Source: PLoS Genet. 2023 Nov 7;19(11):e1011005. doi: 10.1371/journal.pgen.1011005 (PMC10656020; doi:10.1371/journal.pgen.1011005)
Supplement: S1 Data — (XLSX) [file pgen.1011005.s005.xlsx]

## Sheet: RNAseq-FB 
Gene	Proband FPKM	Control Mean FPKM	Control St dev	Ratio Proband FPKM/Control Mean	Z score (Ratio)	P value
DPM1	74.6468	39.1261	4.16559	1.90785	8.52717	0
FGR	3.47195	0.236833	0.364679	14.6599	8.87112	0
WNT16	46.5241	2.72822	3.37291	17.0529	12.9846	0
HCCS	52.0792	20.4068	2.37479	2.55205	13.3369	0
ITGAL	3.47195	0.133434	0.33189	26.02	10.0591	0
PHTF2	162.14	48.6288	10.7063	3.33424	10.6023	0
SCIN	27.4284	1.87192	2.76658	14.6525	9.23756	0
PAX6	8.33267	1.59954	0.58325	5.20941	11.5441	0
SEC62	399.274	165.976	19.7344	2.40561	11.8219	0
WAS	3.12475	0.230282	0.302711	13.5692	9.56183	0
RALBP1	205.192	93.2168	12.8439	2.20123	8.71819	0
SAMD4A	198.595	74.6006	14.3417	2.66211	8.64577	0
ARID4A	71.5221	22.3782	4.75718	3.19606	10.3305	0
PEX3	38.8858	16.5711	2.34832	2.34661	9.5024	0
YTHDC2	65.967	29.2832	3.70728	2.25272	9.89505	0
RCN1	1671.05	564.771	115.998	2.95881	9.53702	0
ARID4B	120.824	42.5171	6.80432	2.84177	11.5084	0
CCAR1	168.042	65.0056	11.5196	2.58504	8.94445	0
SPI1	4.51353	0.165528	0.437805	27.2675	9.93137	0
DNAJA2	147.905	62.4802	5.8648	2.36723	14.5657	0
FBXW11	128.809	69.1003	7.15385	1.86409	8.34641	0
TM9SF3	527.736	279.106	27.9043	1.8908	8.91007	0
NRD1	366.985	161.827	21.5136	2.26775	9.53615	0
PTPRC	10.4158	0.831386	1.02093	12.5283	9.38797	0
YTHDC1	131.587	52.3526	7.20299	2.51347	11.0002	0
ZMPSTE24	186.444	84.3942	9.93859	2.2092	10.268	0
ATRX	186.791	77.7605	12.7515	2.40213	8.55035	0
SCAMP1	107.63	49.7312	5.89856	2.16424	9.81582	0
MTIF2	62.1478	25.0818	4.22981	2.47781	8.76304	0
ESF1	89.5762	24.0715	5.04326	3.72126	12.9886	0
LYZ	11.1102	0.616072	1.17511	18.034	8.93037	0
USP48	136.447	63.4969	8.49211	2.14888	8.59039	0
UPRT	18.4013	7.98546	1.01403	2.30435	10.2718	0
RAB18	272.548	114.742	12.1284	2.37531	13.0112	0
POLR2F	61.1063	22.479	4.00335	2.71837	9.64872	0
HCK	5.20792	0.269583	0.560633	19.3184	8.80849	0
NKAP	32.2891	13.0841	2.04064	2.4678	9.41126	0
NXT2	22.2205	9.149	1.52132	2.42873	8.59219	0
FMR1	94.7841	34.6258	4.6815	2.73739	12.8502	0
HTATSF1	250.675	62.5534	8.92653	4.00737	21.0744	0
PBDC1	59.3703	18.6109	3.31978	3.19009	12.2778	0
FGF9	30.9003	0.844546	1.30824	36.5881	22.9742	0
CORO1A	12.1518	0.815521	1.21265	14.9007	9.34838	0
BLOC1S6	182.624	85.8774	10.2245	2.12657	9.46227	0
EMC2	63.1894	26.0429	2.79772	2.42636	13.2774	0
RASAL3	1.04158	0.0909408	0.114018	11.4534	8.33767	0
SSBP1	136.447	48.9393	8.95223	2.7881	9.77501	0
TAX1BP1	346.153	158.224	21.4399	2.18774	8.76536	0
RHEB	209.706	90.2187	9.70611	2.32441	12.3105	0
CDC37L1	41.3162	17.8669	2.60446	2.31244	9.00349	0
DOCK8	3.47195	0.186872	0.381237	18.5792	8.61689	0
FUBP3	139.572	70.0287	6.94405	1.99307	10.0148	0
EIF3A	882.569	347.62	46.9487	2.53889	11.3943	0
SPOCK2	4.51353	0.332084	0.438267	13.5916	9.54085	0
ZNF330	76.3828	29.6968	4.30283	2.57209	10.8501	0
C11orf58	330.529	128.237	12.3915	2.57748	16.3251	0
EXPH5	8.67987	0.563245	0.606846	15.4105	13.3751	0
MRPL51	149.988	59.714	9.75444	2.51177	9.25466	0
PTPN6	4.16634	0.218395	0.417092	19.077	9.46539	0
CMAS	53.1208	21.2556	2.77845	2.49915	11.4687	0
CLEC4A	2.08317	0.336879	0.205407	6.18373	8.50161	0
RSPH4A	2.08317	0.256691	0.115721	8.11545	15.7834	0
VNN2	4.16634	0.197729	0.426984	21.0709	9.29452	0
ERBB2IP	491.628	146.127	31.846	3.36439	10.8491	0
TTC1	80.5492	37.2358	4.0885	2.16322	10.5939	0
FXR1	329.488	123.488	19.5273	2.66818	10.5493	0
NCL	1418.98	485.186	109.963	2.92462	8.49193	0
ZAP70	1.38878	0.084057	0.146948	16.5219	8.87882	0
STAM2	106.589	46.0487	4.78539	2.3147	12.651	0
TLX2	2.43036	0.219574	0.231842	11.0686	9.53576	0
RAB3GAP1	244.772	106.654	14.3072	2.29502	9.65374	0
PLEK	2.43036	0.144254	0.237579	16.8477	9.62253	0
SUMO1	331.571	100.212	14.0257	3.30869	16.4954	0
EDEM3	173.597	78.2115	11.4098	2.21959	8.36002	0
NCF2	7.29109	0.530543	0.772921	13.7427	8.74674	0
GADD45A	161.098	43.669	13.2554	3.68907	8.85896	0
TSNAX	93.3954	39.5775	4.66373	2.35981	11.5397	0
ZNHIT6	131.24	38.1214	6.3901	3.44268	14.5723	0
SYF2	150.335	41.4436	7.61967	3.62747	14.2909	0
SET	674.252	262.317	42.6902	2.57037	9.64939	0
CSF3R	20.4845	0.771348	2.00594	26.5567	9.82736	0
VPS4B	127.073	55.0826	6.61469	2.30696	10.8835	0
YLPM1	141.308	64.3782	8.64317	2.19497	8.90066	0
FCF1	87.8402	49.4045	4.08139	1.77798	9.41731	0
RBM25	303.795	78.9112	17.2463	3.84984	13.0395	0
EPCAM	1.04158	0.114302	0.108206	9.11255	8.56959	0
UFM1	281.575	117.87	15.8482	2.38886	10.3296	0
WBP4	49.996	20.1779	3.29585	2.47776	9.04715	0
NFYB	129.851	39.8369	9.51578	3.25956	9.45943	0
POLR3GL	63.1894	19.8037	3.27395	3.19078	13.2518	0
LRRC39	1.73597	0.292451	0.118307	5.93595	12.2015	0
ZC3H13	255.188	88.6478	13.0922	2.87867	12.7206	0
SNRNP27	61.4534	29.0161	2.88019	2.11791	11.2622	0
DEK	552.039	167.246	42.1373	3.30077	9.1319	0
UPF3B	34.7195	9.81065	1.85435	3.53896	13.4326	0
KTN1	486.42	207.769	33.4158	2.34115	8.33888	0
HNRNPH2	233.662	101.48	13.1928	2.30255	10.0193	0
CANX	1871.03	884.148	100.383	2.1162	9.83119	0
SHFM1	170.82	47.341	7.13571	3.60828	17.3043	0
NAA38	66.3142	25.7398	4.48823	2.57633	9.04016	0
NDUFA5	113.185	44.3592	5.97314	2.55157	11.5226	0
SNX6	283.311	109.882	16.9063	2.57831	10.2582	0
C6orf203	32.2891	11.2493	1.38302	2.87031	15.2129	0
PRRG1	51.3848	17.9792	3.08275	2.85802	10.8363	0
PPIL4	110.061	36.1967	5.84925	3.04062	12.6279	0
GALNT15	137.489	16.818	11.5838	8.17512	10.4173	0
ZRANB2	197.901	76.1872	12.3724	2.59756	9.83754	0
TCEAL4	274.978	81.1908	16.9694	3.38682	11.4198	0
CCDC59	52.4264	19.3491	3.73645	2.7095	8.8526	0
PRPF38B	130.198	40.7272	7.3633	3.19683	12.1509	0
PNPLA8	93.7425	40.2926	5.07693	2.32655	10.528	0
GCC2	133.323	53.2468	9.31904	2.50386	8.59272	0
SUCLA2	82.9795	40.4353	4.90824	2.05216	8.66793	0
YME1L1	361.43	181.328	15.1957	1.99324	11.8522	0
C9orf78	129.504	50.8809	7.19438	2.54523	10.9283	0
ANP32B	565.233	137.65	25.3345	4.10631	16.8775	0
TLR2	4.16634	0.267655	0.427309	15.566	9.12379	0
NDUFAF1	27.4284	12.2641	1.46867	2.23647	10.3252	0
RSL24D1	220.121	89.9546	14.8374	2.44703	8.77288	0
ASNSD1	110.061	56.1046	6.33829	1.96171	8.51272	0
SSB	401.357	101.737	19.6846	3.94506	15.2211	0
PPIG	245.814	58.3784	10.8075	4.2107	17.3431	0
AP1AR	47.2185	18.7974	3.07422	2.51197	9.24496	0
DENR	185.402	80.4876	9.31853	2.30348	11.2587	0
TMX1	171.167	46.6542	7.57927	3.66884	16.4281	0
MFAP1	76.3828	28.1551	3.93218	2.71293	12.2649	0
BNIP2	187.485	90.3879	10.017	2.07423	9.6932	0
SEC11A	271.159	133.071	12.4086	2.03769	11.1284	0
SLC39A6	247.203	136.345	13.1588	1.81307	8.42458	0
MYO1F	9.72145	1.00667	0.95242	9.65704	9.15015	0
TMCO1	163.181	78.6087	8.35931	2.07587	10.1172	0
PVRL4	1.73597	0.19185	0.170375	9.04861	9.06308	0
FCGR2A	6.2495	0.253251	0.593966	24.6771	10.0953	0
MRPL9	55.8983	25.0681	3.07479	2.22986	10.0268	0
SNRPG	126.032	28.7805	6.78345	4.37906	14.3365	0
RP11-395L14.17	0.694389	0.0611873	0.050866	11.3486	12.4484	0
UBXN4	317.683	152.545	18.5519	2.08255	8.90141	0
SPOPL	59.7175	24.6267	3.63241	2.42491	9.66046	0
METTL14	46.5241	20.9827	2.70283	2.21726	9.44988	0
ZMAT2	149.641	64.2957	5.53638	2.32738	15.4153	0
FAXC	5.20792	0.762498	0.456949	6.83008	9.72848	0
CCDC82	75.6884	26.0246	4.84076	2.90834	10.2595	0
GXYLT1	73.2581	24.0739	5.10195	3.04304	9.64026	0
FAM177A1	135.406	46.6857	7.87288	2.90037	11.2691	0
NEK7	2068.24	505.018	182.69	4.09537	8.55669	0
CCDC175	3.81914	0.72036	0.206973	5.30171	14.9719	0
SCHIP1	0.694389	0.0893046	0.0654633	7.77551	9.24311	0
CWC27	74.994	23.914	4.56565	3.13599	11.1879	0
SRP19	77.4244	32.9398	4.65771	2.35048	9.55076	0
CETN3	82.9795	13.2954	2.84032	6.24123	24.5339	0
MAGED4	4.86072	0.255071	0.192575	19.0563	23.9162	0
C16orf87	26.3868	8.2167	1.33484	3.21136	13.6122	0
RBM45	20.1373	9.70162	1.2299	2.07566	8.48499	0
RNF20	106.936	54.4632	5.96728	1.96345	8.79342	0
SLA	2.77756	0.195303	0.27565	14.2217	9.36786	0
RPGR	21.5261	6.46355	1.64144	3.33038	9.17643	0
NSMCE2	35.0667	13.5642	2.29022	2.58524	9.38883	0
EIF5B	360.041	119.391	23.2017	3.01563	10.3721	0
PTMS	827.365	171.934	45.7934	4.81211	14.3128	0
U2AF1	151.724	52.9957	10.751	2.86295	9.18316	0
CMPK1	316.989	145.499	17.9326	2.17863	9.56297	0
MAGOH	54.5096	20.1519	3.46393	2.70494	9.9187	0
NEXN	286.088	76.2097	25.2839	3.75396	8.30088	0
FCGR3B	20.1373	0.586358	1.91796	34.343	10.1936	0
CCDC104	66.3142	27.3856	4.59906	2.4215	8.46447	0
ARHGAP25	3.81914	0.17047	0.366981	22.4036	9.94239	0
AIMP1	225.677	62.2657	13.3195	3.62441	12.2685	0
LSM6	45.4825	10.4263	1.64863	4.3623	21.2638	0
LMBRD2	60.4119	23.1555	4.32481	2.60896	8.61456	0
TAGAP	4.16634	0.174244	0.399634	23.911	9.98938	0
GTF2A1	132.281	53.2177	6.68809	2.48566	11.8215	0
NEMF	132.281	50.8103	6.85724	2.60343	11.881	0
SYNPO2L	1.73597	0.132379	0.141691	13.1137	11.3176	0
TRIM44	160.057	68.5379	7.8404	2.3353	11.6727	0
TMX3	380.178	135.284	24.7655	2.81022	9.88853	0
NGFRAP1	228.454	76.4894	13.8058	2.98674	11.0073	0
TERF2IP	126.032	55.4794	6.19024	2.27169	11.3974	0
RNF214	33.3307	17.384	1.71185	1.91732	9.31548	0
ATP5H	289.56	76.623	9.66552	3.77903	22.0306	0
KIAA1586	32.2891	11.2331	2.36822	2.87446	8.89105	0
DNAJC21	161.793	55.8063	9.09672	2.89918	11.6511	0
COMMD8	50.3432	18.7618	3.55816	2.68328	8.87578	0
PTAFR	3.12475	0.219471	0.303804	14.2377	9.56301	0
USP47	183.666	85.6927	11.5556	2.14331	8.47845	0
FPR1	6.2495	0.523411	0.678338	11.94	8.44136	0
PPID	80.8963	29.0773	3.99831	2.78211	12.9602	0
OLR1	8.33267	0.66919	0.594581	12.4519	12.8889	0
FAM174A	26.0396	9.377	1.98972	2.77697	8.37435	0
METTL15P1	5.20792	0.263295	0.222748	19.7798	22.1982	0
TBC1D10C	2.77756	0.300243	0.290201	9.25103	8.53654	0
RAB6A	419.411	160.078	14.7915	2.62004	17.5326	0
LINC01106	1.73597	0.273127	0.170117	6.35593	8.59906	0
ZBTB8OS	31.5947	16.8095	1.72636	1.87957	8.56437	0
FKBP9L	78.1188	10.4249	3.40536	7.4935	19.8787	0
C8orf47	4.51353	0.424475	0.282891	10.6332	14.4545	0
MRFAP1	499.613	237.836	22.0657	2.10066	11.8635	0
PTPN11	504.127	212.218	27.4376	2.37551	10.639	0
SOCS4	62.1478	27.6908	3.78577	2.24435	9.10171	0
SRSF8	25.3452	10.3928	1.65265	2.43872	9.0475	0
PITPNB	70.4805	26.4898	4.01956	2.66067	10.9442	0
MEX3D	63.8838	15.645	4.76653	4.08335	10.1203	0
LINC00471	1.38878	0.22744	0.106849	6.10614	10.869	0
ACBD3	201.373	81.9752	11.76	2.45651	10.1529	0
CEP63	68.7445	23.365	4.45904	2.9422	10.177	0
C11orf88	2.77756	0.329836	0.203258	8.42103	12.0424	0
TBK1	82.2851	35.7781	4.72859	2.29987	9.83528	0
MACC1	2.08317	0.152951	0.110032	13.6199	17.5424	0
KCNQ3	9.37425	1.25413	0.807103	7.47469	10.0608	0
APOBR	2.08317	0.129043	0.207221	16.1432	9.43016	0
WBP5	283.311	90.9763	19.6653	3.11411	9.7804	0
C19orf68	16.6653	3.25905	0.824979	5.11356	16.2505	0
MORF4L1	746.816	401.478	37.1754	1.86017	9.28942	0
ARHGAP30	5.20792	0.373452	0.510932	13.9453	9.46205	0
ZFP91	340.945	141.051	20.3147	2.41718	9.83988	0
NAP1L1	1203.72	442.765	81.1152	2.71865	9.38121	0
CLEC2A	30.2059	1.96066	3.03578	15.406	9.30412	0
SELL	15.2766	0.526184	1.48755	29.0328	9.91591	0
SMIM15	115.616	50.6953	6.82033	2.2806	9.51868	0
C1orf192	14.9294	3.97479	0.861126	3.75602	12.7212	0
FAM3C	278.45	73.694	17.285	3.77847	11.8459	0
SERPINA1	7.98548	0.50416	0.842481	15.8392	8.8801	0
HMGN5	9.02706	2.23899	0.797085	4.03176	8.51612	0
MIER1	112.144	49.753	7.2845	2.25401	8.56488	0
MT-ND6	2243.22	537.205	168.145	4.17573	10.1461	0
CTR9	161.445	65.7862	11.3374	2.4541	8.43752	0
OXCT2	1.38878	0.141035	0.102906	9.84707	12.1251	0
CAPZA2	232.968	121.843	13.1318	1.91204	8.46228	0
HSP90B3P	1.38878	0.190944	0.135491	7.27322	8.84072	0
GIGYF2	130.198	60.0624	8.29395	2.16771	8.45623	0
LST1	2.08317	0.097459	0.199658	21.3748	9.94553	0
RP11-304F15.3	1.38878	0.0814671	0.132989	17.0471	9.83025	0
SNORD21	0.694389	0.102878	0.0620193	6.74965	9.53754	0
AL136115.1	1.04158	0.186744	0.0959039	5.5776	8.91351	0
NT5C3AP1	1.73597	0.252574	0.113881	6.87313	13.0259	0
RCN1P2	34.3723	6.50068	3.03949	5.28749	9.16982	0
HNRNPUL2	327.057	159.975	19.6076	2.04443	8.52131	0
UPF3AP2	2.08317	0.193403	0.122956	10.7711	15.3694	0
SRSF9P1	1.04158	0.0670565	0.048535	15.5329	20.0789	0
RP11-420L9.2	3.47195	0.656407	0.284234	5.28932	9.90572	0
RP11-96B5.3	0.694389	0.0502326	0.0379568	13.8235	16.9708	0
UBE2D3P2	1.04158	0.0811264	0.0591754	12.839	16.2307	0
RP11-460N20.5	1.04158	0.182304	0.100308	5.71343	8.56644	0
UPF3AP1	1.38878	0.107367	0.0721543	12.9349	17.7593	0
AP006216.10	0.694389	0.117942	0.0645058	5.88755	8.93636	0
PFN1P7	1.38878	0.179612	0.113556	7.73209	10.6482	0
PGM5P2	1.04158	0.139479	0.0865437	7.46768	10.4237	0
AC005392.13	2.77756	0.261843	0.220103	10.6077	11.4297	0
MT-ATP8	2292.87	426.407	166.658	5.37719	11.1994	0
PET100	69.7861	14.6813	1.83862	4.7534	29.9708	0
RPL5P4	8.67987	2.0158	0.67091	4.30591	9.93287	0
SETSIP	1.04158	0.108581	0.0795654	9.59267	11.7262	0
RP4-631H13.6	1.73597	0.230285	0.144066	7.53838	10.4514	0
AC104655.2	1.73597	0.126573	0.0730933	13.7152	22.0184	0
RP11-146N23.1	3.12475	0.271369	0.198371	11.5148	14.3841	0
RP11-1114A5.4	2.43036	0.44058	0.212144	5.51628	9.37941	0
RP11-367N14.2	1.04158	0.146563	0.0769547	7.10675	11.6305	0
RHOQP2	2.43036	0.475167	0.202164	5.11476	9.67133	0
SNRPEP4	3.81914	0.342243	0.184413	11.1592	18.8538	0
FAM133B	29.5115	10.9946	2.08963	2.68418	8.86134	0
UPF3AP3	0.694389	0.10705	0.0647139	6.48656	9.07593	0
RP11-122G18.5	10.763	3.13903	0.641191	3.42878	11.8904	0
NFAM1	4.16634	0.180454	0.411187	23.0881	9.69361	0
AC005540.3	2.77756	0.0852256	0.0645068	32.5907	41.7371	0
RP1-159A19.3	3.47195	0.222726	0.186379	15.5884	17.4334	0
RP11-175P19.2	0.694389	0.106826	0.0704071	6.50017	8.34522	0
HNRNPA3P5	3.81914	0.382126	0.203704	9.99446	16.8726	0
RAD23BP1	1.38878	0.117505	0.0840195	11.8189	15.1307	0
RP11-365O16.1	0.694389	0.0876977	0.0706866	7.91799	8.58283	0
BMS1P10	8.67987	1.98382	0.563681	4.37532	11.8791	0
AC012668.2	0.694389	0.0706645	0.0553181	9.82657	11.2752	0
FAM200B	43.7465	17.552	3.11736	2.49239	8.40278	0
AC083873.4	1.04158	0.172883	0.103361	6.02478	8.40454	0
AC097500.2	1.04158	0.188092	0.0896039	5.53764	9.52517	0
RP11-432J22.2	2.77756	0.489184	0.165484	5.67794	13.8283	0
SNORD54	1.73597	0.188919	0.113342	9.18899	13.6494	0
SNORD123	1.04158	0.109212	0.0775917	9.53724	12.0164	0
SNORD5	1.38878	0.212945	0.113761	6.52176	10.336	0
MME-AS1	1.04158	0.11839	0.0839334	8.79794	10.9991	0
ISY1	89.229	35.1209	4.19182	2.54063	12.908	0
SEPT7P6	1.38878	0.116158	0.0978379	11.9559	13.0074	0
RPL21P11	1.04158	0.130071	0.0904092	8.00779	10.0821	0
CNTF	3.47195	0.803001	0.31327	4.32372	8.51964	0
RPS27AP1	1.04158	0.0729762	0.0574989	14.2729	16.8457	0
RP11-274H2.2	1.04158	0.0744536	0.0579841	13.9897	16.6792	0
EEF1A1P10	1.38878	0.238868	0.138469	5.814	8.30444	0
RP11-506M13.3	1.73597	0.321552	0.136543	5.39874	10.3588	0
HBB	664.183	33.8602	68.9498	19.6155	9.14177	0
ZNF585B	37.8442	14.3514	2.76265	2.63698	8.50375	0
RP11-325N19.3	0.694389	0.0658905	0.0508198	10.5385	12.3672	0
RP11-392P7.6	11.1102	1.12775	0.987803	9.85166	10.1057	0
CTC-512J14.5	0.694389	0.0738624	0.0523295	9.40112	11.8581	0
MIR302B	0.694389	0.0975334	0.0553838	7.1195	10.7767	0
RP11-1079K10.2	0.694389	0.0567496	0.0485636	12.236	13.13	0
RP11-730G20.2	14.5822	1.54718	0.940726	9.42502	13.8563	0
AC006277.2	0.694389	0.0887445	0.0557519	7.82459	10.8632	0
GS1-251I9.4	61.8006	21.8023	3.96592	2.83459	10.0855	0
RP11-34P1.2	1.38878	0.165226	0.136466	8.40533	8.96601	0
RP11-727A23.4	1.73597	0.144342	0.0980349	12.0268	16.2353	0
RP11-809N8.5	2.08317	0.195567	0.207566	10.6519	9.09397	0
RP11-512M8.3	1.04158	0.179638	0.102491	5.79824	8.40996	0
LSM14A	232.273	119.645	11.9472	1.94135	9.42715	0
RP11-857B24.5	0.694389	0.0967683	0.0702619	7.17579	8.50562	0
RP11-638I2.4	0.694389	0.0969857	0.0624204	7.15971	9.57064	0
EEF1A1P22	4.86072	0.331666	0.221476	14.6555	20.4494	0
RP11-525K10.3	1.04158	0.145428	0.103387	7.16219	8.66794	0
RP11-410E4.1	1.04158	0.0565692	0.0425743	18.4126	23.1364	0
HOXB7	45.4825	9.60212	2.83454	4.73671	12.6583	0
RP11-303E16.3	0.694389	0.0717228	0.058192	9.68157	10.7002	0
RP11-817O13.6	1.38878	0.273241	0.120486	5.08262	9.25864	0
RP11-352G18.2	1.04158	0.067209	0.0566543	15.4977	17.1986	0
YBX3P1	1.73597	0.131736	0.110581	13.1776	14.5074	0
RP11-96K19.4	1.04158	0.146485	0.0651517	7.11049	13.7387	0
AC021224.1	1.04158	0.109835	0.0742129	9.48314	12.5551	0
CTC-325H20.2	0.694389	0.120921	0.0667399	5.74248	8.59258	0
AC002398.13	2.77756	0.760188	0.204627	3.65378	9.85876	0
CTD-2319I12.2	0.694389	0.128315	0.0588383	5.41161	9.62085	0
CTD-3099C6.5	0.694389	0.0926728	0.0628273	7.49292	9.57731	0
RP11-355F16.1	0.694389	0.07629	0.0538473	9.10197	11.4787	0
RP11-373D23.2	1.04158	0.0896414	0.0754526	11.6195	12.6164	0
RP11-27I1.6	0.694389	0.0950598	0.0595754	7.30476	10.06	0
RP11-346C20.3	1.04158	0.121539	0.0975181	8.56993	9.4346	0
RP11-10C24.1	5.55511	0.80594	0.297302	6.89272	15.9743	0
RP4-769N13.6	7.98548	3.24316	0.566863	2.46225	8.3659	0
RP11-349K21.1	0.694389	0.108284	0.0668292	6.41266	8.77019	0
CTC-366B18.4	4.16634	0.366727	0.145386	11.3609	26.1346	0
RP11-458N5.1	1.73597	0.269839	0.155837	6.43338	9.40812	0
CTA-363E19.2	1.73597	0.243029	0.130069	7.14306	11.4781	0
NFYC-AS1	2.08317	0.384942	0.201528	5.41163	8.42675	0
RP11-554D15.3	1.38878	0.188775	0.142143	7.3568	8.44225	0
RP5-1159O4.2	0.694389	0.0883752	0.0716454	7.85728	8.45851	0
RP11-367N14.3	0.694389	0.118947	0.0630921	5.8378	9.12067	0
LL22NC03-80A10.6	39.9274	14.6544	1.92426	2.72461	13.1339	0
RP11-290D2.6	11.4574	1.88529	0.586019	6.07728	16.3342	0
RP11-61L19.2	1.04158	0.125762	0.0825964	8.28216	11.0879	0
FGFR1OP2	70.1333	33.339	4.45382	2.10364	8.26128	1.11e-16
TTC5	29.1643	14.5748	1.78706	2.00101	8.16398	1.11e-16
PPM1B	60.7591	30.4844	3.68595	1.99312	8.21352	1.11e-16
CSNK1G3	105.2	51.7675	6.53275	2.03216	8.17917	1.11e-16
IMPACT	112.144	48.9841	7.71838	2.28939	8.18303	1.11e-16
LDHAL6A	0.694389	0.0923729	0.0734273	7.51724	8.19881	1.11e-16
AC097658.1	0.694389	0.107623	0.071362	6.45207	8.22239	1.11e-16
TYW1	30.9003	16.5651	1.73521	1.86539	8.26138	1.11e-16
RP1-266L20.9	1.04158	0.221805	0.0995024	4.69594	8.23878	1.11e-16
RP11-379F4.7	1.38878	0.345671	0.12581	4.01763	8.29115	1.11e-16
RP11-219D15.3	0.694389	0.105524	0.0718222	6.5804	8.19894	1.11e-16
HAL	0.694389	0.065232	0.0774743	10.6449	8.12085	2.22e-16
CHMP5	129.156	66.1211	7.76136	1.95333	8.12169	2.22e-16
COX16	61.1063	25.9712	4.30551	2.35284	8.16048	2.22e-16
CUL4B	398.927	125.74	33.6855	3.17263	8.10991	2.22e-16
PTMA	1237.75	373.259	106.363	3.31605	8.12775	2.22e-16
HAUS3	30.2059	11.2136	2.33096	2.69369	8.14788	2.22e-16
RP6-109B7.4	0.694389	0.116526	0.0713325	5.95909	8.10097	2.22e-16
RPL5P17	1.04158	0.140863	0.111056	7.39431	8.11051	2.22e-16
LILRA6	1.04158	0.0983675	0.116394	10.5887	8.10362	2.22e-16
TBXAS1	2.08317	0.263028	0.225448	7.91996	8.07344	3.33e-16
RRP15	48.6072	18.4863	3.73656	2.62937	8.06116	3.33e-16
FCER1G	2.77756	0.266089	0.310359	10.4384	8.09213	3.33e-16
HDAC2	189.221	81.2993	13.3704	2.32746	8.07169	3.33e-16
SNORD18B	0.694389	0.104966	0.0728481	6.61539	8.09113	3.33e-16
RP11-151A6.4	0.694389	0.102786	0.0733223	6.75565	8.06853	3.33e-16
PNN	179.5	64.3711	14.3409	2.78851	8.02799	4.44e-16
ARMCX3	276.02	124.99	18.8057	2.20833	8.03106	4.44e-16
CD37	3.81914	0.550729	0.406638	6.9347	8.03765	4.44e-16
UBE2V1P2	1.04158	0.165387	0.109131	6.29787	8.02887	4.44e-16
SORL1	7.29109	0.783646	0.811951	9.30406	8.01457	5.55e-16
GPR89C	0.694389	0.087073	0.0758173	7.97479	8.01026	5.55e-16
SRSF11	351.361	144.854	25.8255	2.42561	7.99624	6.66e-16
CPSF2	146.516	73.0764	9.19461	2.00497	7.98726	6.66e-16
L3MBTL3	40.2746	15.3406	3.12057	2.62535	7.99019	6.66e-16
RP11-454L9.2	0.694389	0.111644	0.0729494	6.21966	7.98834	6.66e-16
CTD-2620I22.7	1.04158	0.261747	0.0976501	3.97935	7.98603	6.66e-16
AGGF1	66.6614	34.1992	4.0689	1.94921	7.97811	7.77e-16
CTSW	1.73597	0.141722	0.199785	12.2491	7.97985	7.77e-16
GPALPP1	43.0521	20.3763	2.85145	2.11286	7.95239	8.88e-16
OTUD6B	26.3868	11.6841	1.84755	2.25835	7.95792	8.88e-16
MAP10	8.33267	2.79967	0.695227	2.9763	7.95854	8.88e-16
CCDC88C	1.38878	0.17394	0.153007	7.98422	7.93977	9.99e-16
RSF1	96.8673	43.1271	6.76495	2.24609	7.94391	9.99e-16
BAZ1A	123.601	44.9238	9.91432	2.75135	7.93574	9.99e-16
RP11-571M6.8	0.694389	0.0797867	0.0774387	8.70307	7.93663	9.99e-16
HNRNPH3	291.296	111.011	22.7653	2.62403	7.9193	1.22e-15
CDC73	98.9505	51.5387	6.00754	1.91993	7.89204	1.44e-15
HSDL2	126.032	42.8217	10.5564	2.94317	7.88243	1.55e-15
APIP	33.3307	13.9516	2.45734	2.38902	7.88617	1.55e-15
NAP1L1P3	1.04158	0.15207	0.11293	6.84938	7.87669	1.67e-15
RP5-855D21.3	1.38878	0.291059	0.139354	4.77146	7.87718	1.67e-15
SMARCA5	240.259	117.001	15.682	2.05347	7.8598	1.89e-15
CSDE1	1154.77	637.133	65.8916	1.81245	7.85588	2e-15
RDX	230.884	112.425	15.0971	2.05368	7.84652	2.11e-15
TCEAL3	90.6178	30.5803	7.65165	2.96327	7.84634	2.11e-15
HBA2	143.044	7.88324	17.2384	18.1453	7.84068	2.22e-15
RP11-973H7.3	1.04158	0.280821	0.0970357	3.70907	7.84003	2.22e-15
NARF-IT1	1.38878	0.161822	0.156596	8.58212	7.83515	2.33e-15
RP11-357H14.17	3.81914	0.381378	0.438571	10.0141	7.83856	2.33e-15
PANK3	177.416	77.7686	12.7347	2.28134	7.82493	2.55e-15
TMCO3	275.325	118.636	20.0595	2.32076	7.81124	2.89e-15
SS18	140.614	80.6933	7.7055	1.74257	7.77634	3.77e-15
SCAF11	223.941	101.783	15.7205	2.20018	7.77057	3.89e-15
LYSMD3	68.7445	30.9296	4.86994	2.22261	7.76497	4.11e-15
WBP2NL	1.38878	0.268289	0.144428	5.17643	7.75811	4.33e-15
CCDC47	184.36	97.6527	11.1811	1.88792	7.75482	4.44e-15
RP11-343N15.5	29.1643	10.758	2.37487	2.71094	7.75046	4.55e-15
ALMS1-IT1	1.38878	0.22802	0.14981	6.09059	7.74822	4.66e-15
RIMKLB	65.6198	28.7256	4.7663	2.28437	7.74064	5e-15
RAB1A	383.65	193.579	24.5786	1.98188	7.73321	5.22e-15
IGSF6	0.694389	0.0720031	0.0804904	9.64388	7.73243	5.33e-15
BRD7P2	1.38878	0.23296	0.149593	5.96145	7.72641	5.55e-15
PTGR2	19.7901	6.92415	1.66618	2.85813	7.72184	5.77e-15
TERF1	56.5927	27.9756	3.7141	2.02293	7.705	6.55e-15
PURA	29.1643	13.3345	2.05457	2.18713	7.70469	6.55e-15
HBA1	29.1643	1.71351	3.56295	17.0202	7.70452	6.55e-15
RP11-773H22.2	0.694389	0.127797	0.0736808	5.43355	7.68983	7.33e-15
WAC-AS1	62.8422	25.6134	4.84367	2.45349	7.68608	7.55e-15
SPCS3	353.444	147.288	26.8529	2.39968	7.67725	8.1e-15
NFE2	1.38878	0.146419	0.162104	9.48495	7.66395	8.99e-15
PDCL	50.6904	26.7796	3.1218	1.89288	7.65932	9.33e-15
NEK4	37.1498	17.39	2.58041	2.13627	7.65764	9.44e-15
HNRNPA3	541.276	207.671	43.6429	2.60642	7.64398	1.05e-14
RAP1A	113.185	62.9611	6.57398	1.7977	7.63987	1.09e-14
SAFB	107.978	42.9052	8.53077	2.51665	7.62795	1.19e-14
AP3B1	159.71	79.0267	10.5959	2.02096	7.61451	1.32e-14
MALT1	144.086	54.1416	11.8421	2.66128	7.59531	1.53e-14
CTD-2525I3.5	0.347195	0.0534493	0.0387034	6.49577	7.58964	1.6e-14
CLEC2B	186.444	32.023	20.3606	5.82217	7.58428	1.68e-14
USP16	120.477	51.1842	9.16635	2.35379	7.55943	2.02e-14
AKIRIN1	128.809	63.0635	8.69754	2.04253	7.55912	2.03e-14
MPP5	73.2581	32.0481	5.45278	2.28588	7.5576	2.05e-14
MSANTD4	49.996	24.7842	3.33641	2.01725	7.55657	2.07e-14
TPR	304.837	135.793	22.382	2.24487	7.55267	2.13e-14
AP000640.10	1.04158	0.175161	0.114742	5.94643	7.55102	2.15e-14
HNRNPD	387.469	130.152	34.0973	2.97706	7.54655	2.23e-14
PIK3AP1	1.73597	0.147435	0.210897	11.7745	7.5323	2.5e-14
CTC-203F4.2	2.08317	0.525265	0.206859	3.96594	7.53125	2.51e-14
IMMP2L	10.4158	4.50493	0.785534	2.3121	7.5247	2.64e-14
YWHAE	782.577	337.6	59.157	2.31806	7.52197	2.7e-14
ITGB8	105.894	17.9795	11.6923	5.88974	7.51903	2.76e-14
RP13-39P12.2	1.04158	0.24561	0.105971	4.24081	7.51121	2.93e-14
AZIN1	278.797	126.315	20.3093	2.20716	7.50802	3e-14
CLPX	69.0917	36.697	4.3147	1.88276	7.50799	3e-14
CFDP1	97.9089	40.9221	7.60083	2.39257	7.49745	3.25e-14
RP11-1C8.6	1.04158	0.212357	0.110886	4.90486	7.4782	3.76e-14
NFU1	35.4139	17.7667	2.36465	1.99327	7.4629	4.23e-14
RP11-10N23.2	1.73597	0.456146	0.171551	3.80574	7.46034	4.32e-14
ZNF720	27.4284	12.7977	1.96265	2.14322	7.45454	4.51e-14
AP4E1	59.7175	27.5509	4.31551	2.16753	7.45371	4.54e-14
RP11-819C21.1	2.08317	0.539437	0.207304	3.86175	7.44669	4.79e-14
NUCB2	289.908	112.815	23.7844	2.56976	7.44573	4.82e-14
U2SURP	183.666	85.7859	13.1621	2.14098	7.43651	5.17e-14
CTB-129P6.4	0.347195	0.0517432	0.0397342	6.70995	7.43569	5.2e-14
TRAM1	811.047	349.697	62.0459	2.31928	7.43561	5.21e-14
FAM192A	91.6594	41.7265	6.71883	2.19667	7.43178	5.36e-14
TWISTNB	69.4389	25.9962	5.84847	2.67111	7.42804	5.51e-14
KIF3A	40.6218	18.8137	2.93945	2.15916	7.41913	5.9e-14
TFAM	59.7175	24.2732	4.77766	2.46023	7.41876	5.91e-14
TM2D1	52.4264	22.5162	4.03374	2.32838	7.41499	6.08e-14
ATG3	93.0482	43.5968	6.66933	2.13429	7.41473	6.1e-14
SLC9B1	1.73597	0.446905	0.17396	3.88443	7.41012	6.31e-14
RHPN1-AS1	0.694389	0.124415	0.0769371	5.58125	7.40832	6.39e-14
DNAJB14	97.5617	45.7717	6.99893	2.13148	7.39969	6.83e-14
SMC3	154.849	60.8695	12.7087	2.54395	7.3949	7.07e-14
DDX42	196.165	120.304	10.2638	1.63057	7.39109	7.28e-14
C1orf115	48.2601	6.17118	5.69673	7.82023	7.38825	7.44e-14
SNRNP48	34.0251	14.7317	2.61384	2.30965	7.38125	7.84e-14
SOX6	6.5967	0.619017	0.810246	10.6567	7.37761	8.06e-14
LILRB3	1.04158	0.132172	0.123357	7.8805	7.37217	8.39e-14
QKI	340.945	176.989	22.2476	1.92636	7.36958	8.56e-14
UFL1	87.1458	45.3327	5.68126	1.92236	7.35984	9.2e-14
RP11-380G5.2	0.694389	0.127386	0.0770694	5.45108	7.35705	9.4e-14
RP11-944L7.4	0.694389	0.148774	0.0742786	4.6674	7.34552	1.02e-13
COQ6	1.04158	5.84757	0.654637	0.178122	-7.34146	1.06e-13
TRAF3IP1	37.8442	18.3703	2.65557	2.06007	7.33323	1.12e-13
LAMTOR2	6.2495	26.1737	2.71859	0.238771	-7.32885	1.16e-13
CEP290	63.5366	23.2651	5.49546	2.73099	7.32815	1.17e-13
VPS26A	153.807	72.3155	11.1295	2.12689	7.32212	1.22e-13
2019-09-07	469.754	250.952	29.887	1.87189	7.321	1.23e-13
AC018804.6	0.694389	0.103228	0.0808012	6.72672	7.31624	1.28e-13
BAG4	31.9419	15.0889	2.30606	2.11691	7.30814	1.35e-13
ROCK1	267.687	111.897	21.3537	2.39227	7.29571	1.49e-13
PMS1	42.7049	16.7825	3.55562	2.54461	7.29056	1.54e-13
SREK1	107.978	48.1029	8.21179	2.24472	7.2913	1.54e-13
PLCB2	2.43036	0.425081	0.27547	5.71741	7.27949	1.68e-13
TMED5	147.905	61.2269	11.9122	2.41568	7.2764	1.71e-13
AC002066.1	1.04158	0.153876	0.122134	6.76896	7.26832	1.82e-13
RP11-802O23.3	3.12475	0.758979	0.325536	4.11705	7.26732	1.83e-13
AC091133.1	1.38878	0.360612	0.141648	3.85117	7.2586	1.96e-13
ABI1	113.533	65.8736	6.57308	1.72349	7.25065	2.07e-13
KLHL8	33.6779	16.1339	2.42003	2.0874	7.24951	2.09e-13
MRPS21	81.9379	45.8894	4.97491	1.78555	7.24607	2.14e-13
TAF9	157.626	72.2525	11.7874	2.1816	7.24283	2.2e-13
MRFAP1L1	89.229	48.2818	5.6545	1.84809	7.24152	2.22e-13
Y_RNA	0.694389	0.122201	0.0790518	5.68234	7.23814	2.27e-13
RP11-573D15.9	3.47195	0.798733	0.369524	4.34682	7.23421	2.34e-13
RP11-773H22.4	0.694389	0.137474	0.0770058	5.05106	7.23212	2.38e-13
CHORDC1	64.5782	23.861	5.63632	2.70643	7.22407	2.52e-13
DNAJC2	59.0231	22.3345	5.08061	2.64268	7.22129	2.57e-13
RAP2A	81.9379	42.76	5.43024	1.91623	7.21478	2.7e-13
C6ORF165	1.04158	0.234827	0.112281	4.43554	7.18515	3.36e-13
RGPD1	1.04158	0.143605	0.12504	7.25313	7.18154	3.45e-13
TTC14	78.466	30.1544	6.72921	2.60214	7.17938	3.5e-13
LIN7C	47.9129	22.111	3.59908	2.16693	7.16903	3.78e-13
BCAP29	165.959	70.9307	13.2863	2.33973	7.15234	4.27e-13
RAB30-AS1	5.90231	2.28107	0.506648	2.58751	7.14744	4.42e-13
LLPH	65.967	29.4711	5.10845	2.23836	7.14421	4.53e-13
SPDYA	0.694389	0.147761	0.0765172	4.69941	7.14386	4.54e-13
TMEM30A	601.688	272.902	46.0758	2.20478	7.13576	4.81e-13
TRMT10A	12.1518	5.28959	0.961974	2.29731	7.13348	4.89e-13
CIR1	85.4099	30.0518	7.76171	2.84209	7.13221	4.94e-13
OR7E126P	0.347195	0.0569862	0.0407161	6.09261	7.12761	5.11e-13
HMGN2P4	0.694389	0.132426	0.078855	5.24359	7.12653	5.15e-13
EIF1AX	235.745	86.3603	20.9665	2.72979	7.12493	5.21e-13
PSMD10	69.0917	38.1437	4.34739	1.81135	7.11875	5.45e-13
MPHOSPH6	45.1353	14.5949	4.29075	3.09254	7.11773	5.49e-13
DYNLL1P1	0.694389	0.107095	0.0825612	6.48386	7.11344	5.66e-13
RP11-549J18.1	1.04158	0.206539	0.117464	5.04305	7.10892	5.85e-13
CCDC148	2.43036	0.50556	0.27088	4.80727	7.10574	5.98e-13
CSGALNACT2	146.169	67.5925	11.0727	2.1625	7.09638	6.4e-13
2019-09-10	270.812	119.113	21.3805	2.27357	7.09521	6.46e-13
POLR2B	202.414	110.041	13.0244	1.83945	7.09237	6.59e-13
AP3S1	212.136	108.811	14.5767	1.94959	7.08836	6.79e-13
RP11-861E21.1	1.04158	0.1872	0.120634	5.56402	7.08244	7.08e-13
DNAJC25	28.47	12.3639	2.27464	2.30266	7.08071	7.17e-13
RBM17	102.422	52.9846	6.99085	1.93306	7.07179	7.65e-13
RNF219	20.8317	8.99464	1.67399	2.31601	7.07114	7.68e-13
RP11-393N4.2	0.694389	0.107701	0.0829995	6.44737	7.06857	7.83e-13
RP11-290F24.6	0.694389	0.0820024	0.0867665	8.46791	7.05787	8.45e-13
ZNF586	13.8878	5.33598	1.21279	2.60267	7.05136	8.86e-13
KCTD4	4.51353	0.492888	0.57041	9.15731	7.04869	9.03e-13
RP11-10C24.3	4.51353	1.30998	0.454714	3.44549	7.0452	9.26e-13
SMARCA1	251.022	119.256	18.704	2.1049	7.0448	9.29e-13
EXOSC3	28.47	12.464	2.27232	2.28417	7.04388	9.35e-13
AEBP2	48.6072	25.1357	3.33245	1.93379	7.04333	9.38e-13
PAFAH1B2	152.766	85.818	9.52236	1.78011	7.03058	1.03e-12
TRAC	2.43036	0.316536	0.300755	7.678	7.02839	1.04e-12
SRP54	130.198	58.2109	10.2495	2.23666	7.02346	1.08e-12
HOXC6	106.936	37.6684	9.86105	2.83887	7.02435	1.08e-12
CEP57	86.1043	37.2944	6.95006	2.30877	7.02295	1.09e-12
PHTF1	47.2185	23.167	3.42875	2.03817	7.01464	1.15e-12
MMP25	2.08317	0.279137	0.257259	7.46287	7.0125	1.17e-12
ARHGAP9	2.43036	0.3565	0.295974	6.81728	7.00691	1.22e-12
PRPF40A	201.026	94.6701	15.1829	2.12343	7.00494	1.24e-12
GGNBP2	117.699	65.7864	7.41619	1.78911	6.99989	1.28e-12
RP11-407N17.5	1.04158	0.279765	0.108918	3.72307	6.99443	1.33e-12
BOD1L1	126.032	58.2669	9.6925	2.16301	6.99147	1.36e-12
CUL5	87.493	47.3385	5.74411	1.84824	6.99057	1.37e-12
RP11-298C3.2	1.04158	0.177944	0.123586	5.85344	6.98817	1.39e-12
RP11-173B14.5	36.1082	6.21	4.28053	5.81453	6.9847	1.43e-12
BMP2K	80.202	24.8873	7.92252	3.22261	6.98196	1.46e-12
SLC4A1AP	50.3432	26.2596	3.45232	1.91714	6.97606	1.52e-12
GOLGA4	328.793	128.324	28.7458	2.56221	6.97386	1.54e-12
MICU2	64.231	32.8741	4.50396	1.95385	6.96207	1.68e-12
ITGB1	6081.11	2306.6	542.914	2.6364	6.95232	1.8e-12
FAR1	165.612	85.4326	11.5348	1.93851	6.95108	1.81e-12
EIF3J	148.946	65.9641	11.9466	2.25799	6.94611	1.88e-12
UQCRB	290.255	126.139	23.6605	2.30108	6.9363	2.01e-12
PKP4	162.14	56.7002	15.209	2.8596	6.93271	2.06e-12
RP11-750H9.5	1.04158	0.205204	0.1208	5.07584	6.92368	2.2e-12
ZFP28	19.7901	9.39642	1.50241	2.10613	6.91799	2.29e-12
CDC5L	99.2977	50.6236	7.03728	1.96149	6.9166	2.31e-12
C4orf3	296.851	146.905	21.6841	2.02071	6.91504	2.34e-12
INPP5D	2.77756	0.270308	0.362859	10.2755	6.9097	2.43e-12
RP11-63E5.6	1.38878	0.372461	0.147538	3.72866	6.88852	2.82e-12
PIK3C3	77.0772	43.6853	4.85072	1.76437	6.8839	2.91e-12
SLFN12	22.9148	8.22037	2.14091	2.78757	6.86365	3.36e-12
VTI1A	43.0521	23.2627	2.88807	1.8507	6.85214	3.64e-12
ZNF24	107.978	57.3761	7.38693	1.88193	6.85013	3.69e-12
MC4R	2.43036	0.360369	0.3022	6.7441	6.84974	3.7e-12
C1GALT1C1	69.7861	24.5542	6.60732	2.84213	6.84574	3.8e-12
SERBP1P1	2.08317	0.382656	0.248766	5.44397	6.83579	4.08e-12
AC104695.3	2.08317	0.51047	0.230074	4.08088	6.83561	4.08e-12
HEG1	847.502	288.034	81.878	2.94237	6.83295	4.16e-12
RP11-629O1.2	2.43036	0.650829	0.260447	3.73425	6.83261	4.17e-12
RPE	78.1188	43.2627	5.10305	1.80568	6.83043	4.23e-12
RP11-15A1.3	6.94389	2.27219	0.684563	3.05603	6.82436	4.42e-12
DNAJC24	22.5677	12.3181	1.50369	1.83207	6.81624	4.67e-12
SNW1	108.672	58.4208	7.37588	1.86016	6.81289	4.78e-12
ADSS	92.701	48.5838	6.49238	1.90806	6.79522	5.41e-12
TM4SF19-AS1	0.694389	0.109807	0.0860362	6.32372	6.7946	5.43e-12
PALMD	6.94389	0.960129	0.881656	7.23225	6.78696	5.73e-12
AC104667.3	0.347195	0.0567922	0.0428264	6.11342	6.78092	5.97e-12
APPL1	106.242	52.0689	7.99127	2.0404	6.77898	6.05e-12
KLHL9	117.699	65.3148	7.73	1.80203	6.77675	6.15e-12
RP5-899B16.1	1.38878	0.202191	0.175111	6.86863	6.77618	6.17e-12
DPP8	84.3683	49.2656	5.18173	1.71252	6.77433	6.25e-12
RP4-785G19.2	0.694389	0.145328	0.0810524	4.77809	6.77416	6.26e-12
NRARP	0.694389	0.106937	0.0867386	6.49346	6.77268	6.32e-12
CASP3	72.5637	38.2318	5.07513	1.89799	6.76473	6.68e-12
snoU13	0.694389	0.103486	0.0873544	6.71	6.76444	6.69e-12
PHAX	97.2145	55.1984	6.22048	1.76118	6.75448	7.17e-12
CCR10	3.12475	0.788232	0.345991	3.96425	6.75312	7.23e-12
RTFDC1	174.986	94.8023	11.8843	1.8458	6.74704	7.54e-12
DNAJA1	361.43	158.279	30.1338	2.28349	6.74161	7.83e-12
LAT2	2.08317	0.486907	0.236809	4.27837	6.7407	7.88e-12
TBC1D15	98.2561	44.7933	7.94087	2.19354	6.7326	8.33e-12
FRS2	72.5637	39.2818	4.9446	1.84726	6.73095	8.43e-12
RB1CC1	197.207	87.9813	16.2346	2.24146	6.72795	8.6e-12
DDX46	137.142	57.6508	11.8207	2.37884	6.72473	8.8e-12
ZUFSP	15.6238	7.12489	1.26548	2.19284	6.71591	9.34e-12
SCIMP	0.694389	0.0925997	0.0896714	7.49883	6.71105	9.66e-12
DYNLT3	118.393	48.8407	10.3679	2.42407	6.70849	9.83e-12
SLC11A1	1.73597	0.295575	0.214802	5.87321	6.70569	1e-11
TMEM38B	30.5531	10.0668	3.06039	3.03504	6.69402	1.09e-11
KRTCAP2	13.1934	44.7404	4.71603	0.294887	-6.68932	1.12e-11
TCEAL8	121.171	60.1377	9.13472	2.01489	6.68145	1.18e-11
PGGT1B	25.3452	12.9906	1.84917	1.95104	6.68113	1.19e-11
ACTR6	32.6363	15.973	2.49522	2.04322	6.6781	1.21e-11
ZNF285B	0.694389	0.128107	0.0847903	5.4204	6.67862	1.21e-11
LARP7	88.5346	40.9915	7.12327	2.15983	6.67434	1.24e-11
TAF1B	36.4554	16.3536	3.01216	2.2292	6.67355	1.25e-11
SIRT1	55.2039	28.5098	4.00306	1.93632	6.66843	1.29e-11
MAP3K7	121.171	74.0414	7.06687	1.63653	6.66908	1.29e-11
SPOP	90.6178	48.3466	6.34002	1.87434	6.66736	1.3e-11
ZHX1	94.7841	47.3531	7.12157	2.00165	6.6602	1.37e-11
REEP3	225.677	98.7839	19.0565	2.28455	6.65876	1.38e-11
RPL12P38	0.694389	0.155889	0.0808744	4.45438	6.65847	1.38e-11
SETP14	4.86072	1.11498	0.562679	4.35948	6.65698	1.4e-11
GTPBP10	32.2891	15.4926	2.52456	2.08417	6.65326	1.43e-11
NPM1P6	2.08317	0.442263	0.246815	4.71025	6.64832	1.48e-11
RP11-145M4.3	0.694389	0.093819	0.0904345	7.40137	6.64095	1.56e-11
PMS2P1	10.0686	5.42035	0.700234	1.85756	6.6382	1.59e-11
GBE1	323.933	150.941	26.0755	2.14608	6.63426	1.63e-11
RND3	836.739	276.277	84.6749	3.02863	6.61899	1.81e-11
LTV1	75.3412	31.3071	6.65403	2.40652	6.61767	1.82e-11
RP2	58.6759	26.087	4.93229	2.24924	6.60725	1.96e-11
LPGAT1	180.541	89.9115	13.7257	2.00799	6.60293	2.02e-11
IFT20	40.2746	22.5061	2.69137	1.78949	6.60201	2.03e-11
MPHOSPH10	80.5492	33.2674	7.16821	2.42126	6.59603	2.11e-11
RP11-73M18.6	1.38878	0.344515	0.158338	4.03111	6.59514	2.12e-11
TMED2	550.998	310.889	36.4074	1.77233	6.59507	2.13e-11
TSR2	43.0521	24.1469	2.86892	1.78293	6.58968	2.2e-11
EIF2AK2	171.861	85.4368	13.1221	2.01156	6.58619	2.26e-11
FAM91A1	103.811	55.5004	7.3374	1.87046	6.58418	2.29e-11
THOC2	112.491	57.4095	8.37063	1.95945	6.58034	2.35e-11
RP11-889L3.1	17.0125	3.99295	1.97878	4.26065	6.5796	2.36e-11
ZNF852	3.81914	1.35492	0.375198	2.81872	6.56779	2.55e-11
SF3B5	8.67987	47.0413	5.84548	0.184516	-6.56258	2.64e-11
RPAP3	52.7736	24.7611	4.26979	2.13131	6.56063	2.68e-11
GCA	6.94389	1.35596	0.851738	5.12102	6.56062	2.68e-11
SRSF5	422.189	174.166	37.8121	2.42406	6.55935	2.7e-11
ADAM9	791.257	307.898	73.6962	2.56987	6.5588	2.71e-11
RP11-712L6.5	1.73597	0.524989	0.184648	3.30669	6.55835	2.72e-11
PDZD8	116.31	52.7538	9.69595	2.20477	6.55494	2.78e-11
RP11-863K10.4	1.38878	0.416946	0.148353	3.33083	6.55081	2.86e-11
JRKL	46.5241	21.9649	3.74968	2.11811	6.54967	2.88e-11
TWSG1	474.615	189.67	43.5101	2.50233	6.54895	2.9e-11
NSRP1	80.5492	37.2972	6.60496	2.15966	6.54841	2.91e-11
PRKAR1A	554.123	310.965	37.1357	1.78194	6.54781	2.92e-11
SIAH1	22.5677	10.3466	1.86656	2.18117	6.5474	2.93e-11
KRIT1	62.8422	30.6205	4.92388	2.05229	6.54397	3e-11
ROCK2	286.088	120.889	25.2451	2.36655	6.54384	3e-11
SENP6	153.807	84.8686	10.5389	1.8123	6.54134	3.05e-11
RAB22A	98.6033	56.8573	6.3851	1.73422	6.53803	3.12e-11
CEP112	30.2059	12.5644	2.69902	2.4041	6.53628	3.15e-11
TSPYL1	118.741	68.8356	7.63587	1.72499	6.53559	3.17e-11
ADAM10	372.193	178.594	29.6242	2.08401	6.53514	3.18e-11
DNAJC8	160.057	80.2176	12.2185	1.99528	6.53431	3.2e-11
DAP3P2	0.347195	0.0626231	0.0435655	5.54419	6.53204	3.24e-11
VPS54	60.0647	31.01	4.4533	1.93694	6.52429	3.42e-11
RP11-390B4.5	0.694389	0.111925	0.089295	6.20403	6.52292	3.45e-11
AC018890.6	0.694389	0.119191	0.0882255	5.82587	6.51964	3.52e-11
CSPP1	25.3452	11.7823	2.08434	2.15112	6.50704	3.83e-11
STAT1	1313.09	487.72	126.881	2.69231	6.50507	3.88e-11
TAOK1	259.354	144.776	17.6344	1.79142	6.49742	4.09e-11
CRYZL1	31.9419	16.0601	2.44731	1.98889	6.48948	4.31e-11
UXT	14.5822	35.1708	3.1733	0.41461	-6.48808	4.35e-11
CTD-2555O16.4	2.77756	1.00012	0.274271	2.77722	6.48058	4.57e-11
GINM1	188.874	82.3515	16.4471	2.29351	6.47667	4.69e-11
ZNF709	4.86072	1.55769	0.510008	3.12048	6.47645	4.7e-11
EEF1A1P13	23.6092	4.95635	2.8822	4.76344	6.47174	4.84e-11
SNX14	119.435	62.9488	8.72949	1.89733	6.47072	4.88e-11
SECISBP2L	121.518	67.6579	8.32397	1.79607	6.4705	4.88e-11
ZNF790	9.02706	3.65561	0.830253	2.46937	6.46965	4.91e-11
YWHAZP5	0.694389	0.107519	0.0907731	6.45829	6.46525	5.06e-11
NAMPTL	2.77756	0.456408	0.359229	6.08569	6.46147	5.18e-11
UBLCP1	72.9109	42.5231	4.70593	1.71462	6.45734	5.33e-11
POLR2K	56.5927	31.7861	3.84446	1.78042	6.45257	5.5e-11
SRFBP1	23.262	10.3541	2.00442	2.24666	6.43974	5.98e-11
RP11-848P1.2	0.694389	0.151965	0.084268	4.56941	6.4369	6.1e-11
NEFH	7.98548	1.57071	0.997162	5.08399	6.43302	6.25e-11
MTM1	20.1373	10.7564	1.45918	1.87213	6.42888	6.43e-11
TCEANC2	16.6653	7.57851	1.41461	2.19903	6.42354	6.66e-11
CEP95	38.5386	18.0736	3.18754	2.13231	6.42031	6.8e-11
RP11-1149O23.2	1.38878	0.227762	0.180923	6.0975	6.41717	6.94e-11
HSP90B1	3069.55	1205.53	290.653	2.54621	6.41318	7.13e-11
BBS7	54.8567	27.1766	4.33011	2.01853	6.39249	8.16e-11
MIR616	1.38878	0.31628	0.167937	4.39098	6.3863	8.5e-11
PPP3CB	159.015	87.3386	11.2372	1.82067	6.37848	8.94e-11
Y_RNA	2.77756	0.551789	0.348986	5.03373	6.37782	8.98e-11
RP5-1148A21.3	3.12475	0.94819	0.341308	3.29549	6.37711	9.02e-11
RP11-324I22.3	0.347195	0.0644343	0.0443535	5.38835	6.37515	9.14e-11
C10orf118	52.4264	23.6468	4.51694	2.21706	6.37148	9.36e-11
TLK2	60.7591	37.2938	3.68322	1.6292	6.37085	9.4e-11
PPP1R2	81.2435	46.4557	5.46137	1.74884	6.36981	9.46e-11
CACNA2D1	97.9089	45.993	8.16559	2.12878	6.35788	1.02e-10
H1F0	284.005	117.276	26.2299	2.42167	6.35645	1.03e-10
LINC00657	798.2	419.821	59.5581	1.90129	6.35311	1.06e-10
SPCS1	99.6449	61.1736	6.05818	1.62889	6.3503	1.07e-10
CDK11A	32.2891	12.6228	3.09778	2.55799	6.3485	1.09e-10
TMF1	129.156	66.4385	9.87889	1.944	6.34869	1.09e-10
NARG2	63.5366	31.6779	5.02037	2.00571	6.3459	1.11e-10
HNRNPA3P12	1.04158	0.188116	0.134752	5.53694	6.33364	1.2e-10
TTLL9	0.694389	0.163863	0.0837779	4.23761	6.33253	1.21e-10
ATP13A3	596.828	219.272	59.6507	2.72186	6.32944	1.23e-10
PIGK	173.945	82.0548	14.5199	2.11986	6.32855	1.24e-10
RP11-64D24.4	0.347195	0.0593549	0.0454827	5.84946	6.32856	1.24e-10
LCP1	14.5822	1.05755	2.13787	13.7886	6.32621	1.26e-10
AC097523.1	0.694389	0.133276	0.0886967	5.21014	6.3262	1.26e-10
RP11-787I22.3	0.694389	0.153812	0.0855115	4.51452	6.32169	1.29e-10
LACE1	7.63828	3.50034	0.654745	2.18215	6.31992	1.31e-10
C22orf46	29.5115	14.9744	2.30086	1.9708	6.31812	1.32e-10
DDX3X	801.325	354.294	70.7547	2.26175	6.31804	1.32e-10
THRAP3	239.217	133.613	16.7186	1.79037	6.31658	1.34e-10
TRAF3IP2-AS1	7.63828	2.77607	0.770225	2.75147	6.31271	1.37e-10
CTD-2196E14.6	1.73597	0.500038	0.196149	3.47168	6.30101	1.48e-10
CDV3	432.604	221.817	33.4637	1.95028	6.299	1.5e-10
ZBTB41	61.8006	30.9935	4.89451	1.99399	6.29423	1.54e-10
SGPP1	64.231	35.3368	4.59478	1.81768	6.28848	1.6e-10
BTBD10	58.3287	33.8411	3.89363	1.72361	6.28915	1.6e-10
UHMK1	186.444	84.4397	16.2189	2.20801	6.2892	1.6e-10
PKN2	101.728	49.4425	8.31547	2.0575	6.28774	1.61e-10
RP11-488L18.6	0.347195	0.0602354	0.0456501	5.76397	6.28606	1.63e-10
CDRT1	1.73597	0.381131	0.215524	4.5548	6.28627	1.63e-10
ASPH	1194	475.153	114.387	2.51288	6.28436	1.65e-10
LHFP	245.814	100.221	23.1834	2.45272	6.28005	1.69e-10
CACYBPP2	1.73597	0.496219	0.197454	3.4984	6.27869	1.71e-10
UROS	68.0501	36.1572	5.08741	1.88207	6.269	1.82e-10
RP11-97O12.6	2.08317	0.55689	0.243598	3.74071	6.26555	1.86e-10
DHX29	110.755	58.2534	8.38419	1.90126	6.26198	1.9e-10
TAF15	206.928	101.334	16.8624	2.04203	6.26208	1.9e-10
PABPC5	9.72145	3.8305	0.941672	2.5379	6.25584	1.98e-10
CWC22	51.732	24.2961	4.39078	2.12923	6.24854	2.07e-10
ACTR2	996.101	463.647	85.2403	2.1484	6.24651	2.1e-10
APLP2	2550.49	852.525	271.915	2.99169	6.24449	2.13e-10
SMEK2	121.518	68.7097	8.47767	1.76857	6.22911	2.35e-10
PPP1R12A	261.785	115.446	23.5107	2.2676	6.22434	2.42e-10
ELOVL4	25.6924	9.99429	2.52439	2.57071	6.21858	2.51e-10
GMDS	23.262	9.91239	2.14892	2.34676	6.21227	2.61e-10
RP11-367G18.2	0.694389	0.139269	0.0894213	4.98595	6.20792	2.68e-10
PMS2	22.9148	12.0285	1.75392	1.90504	6.20685	2.7e-10
RNF141	103.117	43.9764	9.53198	2.34482	6.20441	2.75e-10
ZCCHC10	20.8317	11.2711	1.5437	1.84824	6.19327	2.95e-10
SLU7	95.4785	50.1492	7.31939	1.90389	6.19304	2.95e-10
AC016586.1	0.347195	0.0606579	0.046274	5.72382	6.19218	2.97e-10
NECAB1	11.4574	4.49567	1.12438	2.54855	6.19165	2.98e-10
RP4-657D16.3	1.73597	0.481222	0.202758	3.60743	6.18841	3.04e-10
USP8	117.352	63.8553	8.6478	1.83778	6.18614	3.08e-10
HNRNPU	548.22	282.071	43.045	1.94356	6.18306	3.14e-10
NCBP2	135.406	82.0984	8.62495	1.64931	6.18061	3.19e-10
MSH3	34.7195	17.2577	2.82917	2.01183	6.17206	3.37e-10
KDELC2	262.479	89.6281	28.0064	2.92854	6.17184	3.37e-10
LUC7L3	208.317	79.5886	20.8674	2.61742	6.16887	3.44e-10
GRHPR	23.262	60.4308	6.02761	0.384937	-6.16641	3.49e-10
RP11-523G9.3	3.81914	1.12518	0.43696	3.39425	6.16524	3.52e-10
CTB-89H12.4	0.694389	0.139454	0.0900567	4.97934	6.16207	3.59e-10
RAD50	134.712	62.212	11.7854	2.16536	6.15165	3.83e-10
TACO1	23.262	12.9251	1.68079	1.79975	6.15003	3.87e-10
MOCS2	69.4389	35.9226	5.45037	1.93301	6.14936	3.89e-10
STX2	118.046	61.6873	9.17767	1.91362	6.14087	4.1e-10
TRPC1	31.2475	15.6134	2.54765	2.00133	6.1367	4.21e-10
KIAA1429	122.213	67.705	8.88797	1.80507	6.13273	4.32e-10
TMSB4XP4	15.971	3.18346	2.08545	5.01686	6.13176	4.35e-10
TNNT1	2.43036	0.269215	0.352547	9.02758	6.13009	4.39e-10
CWF19L2	22.2205	10.0671	1.98284	2.20723	6.12926	4.41e-10
AC008753.6	0.694389	0.106699	0.0958882	6.50792	6.12891	4.42e-10
SMEK1	92.3538	50.763	6.78722	1.81931	6.12782	4.45e-10
KRT8P3	0.347195	0.0564204	0.0474613	6.15371	6.12655	4.49e-10
ZNF638	163.529	81	13.4756	2.01887	6.12428	4.55e-10
MTDH	300.671	180.773	19.6007	1.66325	6.11701	4.77e-10
HERC4	247.203	88.2729	25.9926	2.80043	6.11443	4.85e-10
RP11-578F21.12	1.73597	0.321933	0.231286	5.39234	6.11381	4.86e-10
RANBP2	197.554	98.6159	16.1859	2.00327	6.11259	4.9e-10
PTX3	3154.61	746.948	393.889	4.22333	6.11253	4.9e-10
KIF2A	63.8838	33.4741	4.97708	1.90846	6.10996	4.98e-10
HSPA8P5	1.38878	0.24614	0.187031	5.64223	6.10934	5e-10
UPF2	78.1188	35.6393	6.95426	2.19193	6.10841	5.03e-10
ALG10	4.86072	1.98657	0.470675	2.44679	6.10645	5.09e-10
CTD-3105H18.4	1.04158	0.228801	0.13314	4.55236	6.10471	5.15e-10
RP11-568J23.5	0.694389	0.160618	0.0874761	4.32324	6.10191	5.24e-10
TRIP11	102.075	53.1373	8.02456	1.92097	6.09852	5.35e-10
DCAF6	222.899	112.492	18.1051	1.98147	6.09813	5.37e-10
SENP2	59.3703	32.969	4.33138	1.80079	6.09535	5.46e-10
ISPD	3.12475	1.22736	0.311514	2.54591	6.09087	5.62e-10
ECHDC1	104.158	56.4747	7.8295	1.84434	6.09025	5.64e-10
SEC63	385.039	208.526	29.0001	1.84648	6.08662	5.77e-10
EXOC7	60.7591	127.947	11.0434	0.474875	-6.08405	5.86e-10
RP4-545K15.5	1.73597	0.565725	0.192437	3.06858	6.08119	5.96e-10
TRIM52	15.6238	5.53871	1.65852	2.82083	6.08076	5.98e-10
AC009120.5	0.694389	0.16121	0.0877068	4.30736	6.07911	6.04e-10
CLUL1	0.694389	0.0992196	0.0979446	6.99851	6.07659	6.14e-10
ATP6V1H	65.967	32.6907	5.47695	2.01791	6.07569	6.17e-10
TOPORS	55.8983	29.1206	4.40767	1.91955	6.07526	6.19e-10
LINC00968	40.2746	8.92354	5.16426	4.51329	6.07077	6.37e-10
RP11-1407O15.2	16.6653	5.23605	1.88523	3.18281	6.06255	6.7e-10
C18orf32	60.0647	30.848	4.82052	1.94712	6.0609	6.77e-10
RP11-335L23.5	0.347195	0.069064	0.0458967	5.02714	6.05992	6.81e-10
PCYT1A	168.389	97.6483	11.6761	1.72445	6.05863	6.86e-10
YAP1	354.486	212.92	23.3924	1.66488	6.05178	7.16e-10
DNAJB11	145.127	67.3901	12.8485	2.15354	6.05031	7.23e-10
TRUB1	40.6218	22.3966	3.01726	1.81375	6.04029	7.69e-10
MIB1	134.712	67.4582	11.1352	1.99696	6.03971	7.72e-10
ZNF326	60.4119	28.087	5.35401	2.15088	6.03751	7.83e-10
IER3IP1	96.1729	54.4436	6.91618	1.76647	6.03357	8.02e-10
CFP	1.04158	0.22058	0.136207	4.72203	6.0276	8.32e-10
RP11-93O14.2	0.347195	0.0624907	0.0472521	5.55594	6.02521	8.44e-10
FCHO1	1.04158	0.19521	0.140554	5.33572	6.02169	8.63e-10
IMPG2	1.38878	0.394639	0.165124	3.51912	6.02056	8.69e-10
RAB21	91.6594	51.9909	6.59149	1.76299	6.01813	8.82e-10
TMTC3	115.963	59.4522	9.39542	1.95053	6.01472	9.01e-10
COIL	25.3452	14.7404	1.76427	1.71944	6.01087	9.23e-10
EXOC1	76.3828	44.0826	5.3799	1.73272	6.00386	9.63e-10
EFCAB2	14.235	5.51977	1.45173	2.57891	6.00335	9.66e-10
RRN3	70.1333	34.2284	5.98512	2.04898	5.99903	9.93e-10
CD2AP	71.8693	31.886	6.66916	2.25395	5.99526	1.02e-09
PHF14	60.7591	31.5004	4.88223	1.92884	5.9929	1.03e-09
VPS37A	71.5221	44.452	4.51759	1.60897	5.99214	1.04e-09
RP11-312O7.2	2.77756	0.703663	0.346241	3.94728	5.98974	1.05e-09
RBM41	18.4013	8.82646	1.59895	2.08479	5.9882	1.06e-09
snoU13	0.347195	0.0628264	0.0474983	5.52625	5.98692	1.07e-09
RWDD4P1	0.347195	0.0590169	0.0481435	5.88297	5.98581	1.08e-09
MINPP1	43.7465	22.7404	3.5102	1.92374	5.98431	1.09e-09
ZFR	212.83	126.66	14.4153	1.68033	5.97768	1.13e-09
AC073621.2	1.04158	0.180298	0.144092	5.77701	5.97731	1.13e-09
ASLP1	1.04158	0.233767	0.135205	4.45566	5.97476	1.15e-09
G3BP2	269.77	162.003	18.0598	1.66522	5.96722	1.21e-09
DYNC1LI1	75.3412	37.4898	6.34762	2.00964	5.96309	1.24e-09
USP12	67.0086	37.3032	4.98761	1.79632	5.95583	1.29e-09
HSP90AB2P	0.694389	0.135712	0.0938572	5.11663	5.95241	1.32e-09
GPATCH2	22.2205	12.201	1.68437	1.82119	5.94848	1.35e-09
RP11-154J22.1	0.347195	0.0596149	0.0483557	5.82396	5.94717	1.36e-09
HSDL1	44.7881	22.327	3.78297	2.006	5.93742	1.45e-09
API5	189.568	112.049	13.0642	1.69183	5.93368	1.48e-09
TOP2B	264.909	129.866	22.7707	2.03988	5.9306	1.51e-09
GS1-124K5.2	1.04158	0.287808	0.127111	3.61903	5.93007	1.51e-09
GLRX3	102.075	47.5605	9.1979	2.14622	5.92687	1.54e-09
CINP	38.5386	23.1854	2.59246	1.66219	5.92225	1.59e-09
ARL5A	76.3828	43.1499	5.6128	1.77017	5.92091	1.6e-09
CBX3	290.949	149.009	23.9745	1.95256	5.92046	1.61e-09
TOP1	141.655	65.9773	12.7837	2.14703	5.91987	1.61e-09
NUCKS1	488.85	237.433	42.5085	2.05889	5.9145	1.66e-09
BCDIN3D	7.29109	2.70587	0.775251	2.69454	5.91449	1.66e-09
COX7A2L	153.113	90.9303	10.5233	1.68385	5.90904	1.72e-09
RASGRP2	3.47195	0.410714	0.518402	8.45345	5.90513	1.76e-09
ZMYND11	205.539	119.919	14.5016	1.71399	5.90423	1.77e-09
ZC3H15	118.046	60.0702	9.82689	1.96514	5.89972	1.82e-09
MAN1A2	147.558	80.1038	11.4379	1.84208	5.89742	1.85e-09
RAB2A	267.34	167.081	17.0467	1.60006	5.88141	2.03e-09
SLC35A3	55.8983	25.9366	5.09837	2.15519	5.87673	2.09e-09
SUPT6H	179.152	115.638	10.8137	1.54926	5.87356	2.13e-09
MYO1B	890.207	369.335	88.7003	2.4103	5.87228	2.15e-09
SEMA3E	4.16634	0.476401	0.628486	8.74544	5.87115	2.16e-09
MFSD2B	0.694389	0.107773	0.0999793	6.44307	5.86738	2.21e-09
FBL	137.142	65.3218	12.2465	2.09948	5.86454	2.25e-09
AC098614.2	12.499	4.01096	1.44728	3.11621	5.86481	2.25e-09
EEA1	211.442	85.7783	21.4308	2.46498	5.86368	2.26e-09
DYNC1LI2	233.315	130.889	17.4684	1.78254	5.86348	2.27e-09
C1orf131	16.6653	8.80296	1.34127	1.89315	5.8619	2.29e-09
PDAP1	208.664	103.921	17.875	2.00791	5.85975	2.32e-09
SYNPO2	532.249	100.689	73.6584	5.28608	5.85894	2.33e-09
PDCD4	175.68	63.4341	19.1609	2.76949	5.85811	2.34e-09
COMMD9	10.0686	26.9732	2.88769	0.373284	-5.854	2.4e-09
IARS2	178.458	107.842	12.0703	1.65481	5.85042	2.45e-09
MESDC2	106.936	59.8583	8.05311	1.78648	5.84589	2.52e-09
CCDC103	0.347195	0.0677389	0.047842	5.12548	5.84122	2.59e-09
CUL3	122.907	71.6974	8.7756	1.71425	5.83544	2.68e-09
CACYBP	111.102	51.4946	10.2229	2.15755	5.83078	2.76e-09
PPP6C	88.5346	56.7278	5.45738	1.56069	5.82822	2.8e-09
RP11-439A17.10	0.694389	0.153065	0.0929052	4.53656	5.82663	2.83e-09
RUFY1	74.2996	39.0968	6.04359	1.9004	5.82483	2.86e-09
SMNDC1	50.6904	31.2456	3.33871	1.62232	5.82406	2.87e-09
RAD17	44.4409	26.9117	3.00966	1.65136	5.82433	2.87e-09
CRLF3	28.8172	15.2009	2.33781	1.89576	5.82439	2.87e-09
TATDN1	36.4554	18.0901	3.15368	2.01522	5.82346	2.88e-09
MORF4L1P1	36.1082	15.4345	3.55208	2.33945	5.82019	2.94e-09
STC2	1124.22	261.664	148.223	4.29641	5.81928	2.96e-09
EIF3K	40.6218	87.2263	8.01132	0.465705	-5.81734	2.99e-09
RIOK3	134.364	72.8328	10.5805	1.84483	5.81554	3.02e-09
ARL4C	321.155	79.3977	41.5739	4.04489	5.81513	3.03e-09
TAF1D	102.075	52.2503	8.57079	1.95358	5.81335	3.06e-09
PLEKHF2	21.1789	10.8251	1.7821	1.95646	5.80986	3.13e-09
MRPL46	1.04158	5.22144	0.719503	0.199482	-5.80936	3.14e-09
HSP90AA1	1840.83	818.666	175.979	2.24857	5.80841	3.15e-09
SERINC1	738.83	379.499	61.8618	1.94686	5.80862	3.15e-09
UPF3A	84.3683	41.025	7.46343	2.05651	5.80742	3.17e-09
ARGLU1	135.406	58.8836	13.1805	2.29955	5.80572	3.2e-09
SRPK2	85.4099	55.1313	5.21704	1.54921	5.80378	3.24e-09
SUZ12	68.7445	35.3851	5.75427	1.94275	5.79734	3.37e-09
CTD-3195I5.1	12.8462	6.48966	1.0977	1.97949	5.79076	3.5e-09
RP1-232L22__B.1	1.04158	0.144075	0.154996	7.22943	5.79052	3.51e-09
ST13	487.808	255.424	40.1406	1.9098	5.78927	3.53e-09
SNAP47	6.94389	19.0479	2.09164	0.364549	-5.78683	3.59e-09
CDC40	46.8713	24.8378	3.81348	1.8871	5.7778	3.78e-09
AL353898.3	1.04158	0.319335	0.12517	3.26172	5.77014	3.96e-09
COX20P1	6.5967	0.708965	1.02053	9.30468	5.76931	3.98e-09
LSM3	56.5927	27.7569	4.9987	2.03887	5.76867	3.99e-09
AATF	72.2165	38.1051	5.92096	1.89519	5.76112	4.18e-09
PPP4R2	107.63	62.1328	7.90685	1.73226	5.75419	4.35e-09
COG1	9.37425	23.784	2.50433	0.394141	-5.75395	4.36e-09
RAD23B	782.229	355.575	74.1618	2.1999	5.75303	4.38e-09
MORN2	22.9148	12.3475	1.83728	1.85582	5.75159	4.42e-09
RP11-255M2.2	0.694389	0.101748	0.103099	6.82458	5.74826	4.51e-09
LONRF1	32.9835	16.1355	2.93237	2.04416	5.74551	4.58e-09
PDPK2	3.81914	0.918531	0.505038	4.15788	5.74335	4.64e-09
PPP1CB	227.76	131.729	16.7248	1.729	5.74181	4.68e-09
TMEM14A	29.5115	14.379	2.63673	2.05241	5.73914	4.76e-09
PCMT1	113.533	59.8451	9.36127	1.89711	5.73507	4.87e-09
RP11-199F11.2	1.04158	0.2349	0.14069	4.43416	5.73376	4.91e-09
LCNL1	14.9294	2.02507	2.25321	7.37226	5.72707	5.11e-09
NPM1	1417.25	608.399	141.325	2.32947	5.72333	5.22e-09
GS1-293C5.1	0.694389	0.161229	0.093244	4.30686	5.71791	5.39e-09
RDH14	24.998	13.8983	1.94132	1.79863	5.71758	5.4e-09
NLK	22.2205	12.4341	1.71183	1.78706	5.71689	5.42e-09
RUFY2	46.8713	27.065	3.46494	1.7318	5.7162	5.45e-09
DHX36	87.493	50.7004	6.44258	1.72569	5.71086	5.62e-09
FUNDC1	14.9294	8.30988	1.15958	1.79658	5.70852	5.7e-09
LEO1	57.6343	26.8353	5.39774	2.14771	5.70591	5.79e-09
GFM2	43.0521	23.8083	3.37298	1.80828	5.70529	5.81e-09
RP11-96D1.10	0.347195	0.062208	0.0500013	5.58119	5.69958	6.01e-09
RP11-426C22.4	20.1373	4.64321	2.71898	4.33693	5.69848	6.04e-09
DNAJC7	96.1729	59.0648	6.51686	1.62826	5.69416	6.2e-09
ZRANB1	92.0066	51.6778	7.08388	1.78039	5.69303	6.24e-09
TMEM123	463.158	212.244	44.0811	2.1822	5.6921	6.27e-09
BMPR1APS2	0.347195	0.0737313	0.0480594	4.70892	5.69011	6.35e-09
VPS35	218.038	127.479	15.916	1.71039	5.68982	6.36e-09
RP11-893F2.15	0.347195	0.0681943	0.0490369	5.09126	5.6896	6.37e-09
WHSC1L1	131.24	71.4027	10.5218	1.83802	5.68694	6.47e-09
EIF4A2	531.208	236.483	51.8334	2.24628	5.68599	6.5e-09
NUDT12	24.6508	10.5931	2.47321	2.32706	5.68399	6.58e-09
LY96	20.1373	8.35169	2.07371	2.41116	5.68335	6.6e-09
EXOC5P1	0.694389	0.137527	0.098008	5.0491	5.6818	6.66e-09
RP11-222A11.1	3.12475	0.546031	0.453918	5.72267	5.68103	6.69e-09
ANKRD12	111.102	49.3734	10.8687	2.25025	5.67949	6.75e-09
ELMOD2	72.5637	42.2569	5.33958	1.7172	5.67587	6.9e-09
ALDH9A1	186.444	91.6682	16.7139	2.0339	5.67047	7.12e-09
BTF3L4P2	1.04158	0.310086	0.129144	3.35902	5.6642	7.39e-09
ZFAND2B	3.47195	15.7599	2.17037	0.220303	-5.66168	7.5e-09
CD63	1452.66	710.559	131.103	2.04439	5.66047	7.55e-09
CALM2	1318.65	633.91	120.983	2.08018	5.65976	7.58e-09
MRPS5	48.2601	28.801	3.44004	1.67564	5.65665	7.72e-09
TAF1	74.6468	39.8124	6.15862	1.87497	5.65622	7.74e-09
THOC1	37.497	17.6192	3.51509	2.12819	5.65498	7.79e-09
BTBD1	161.098	93.7201	11.9358	1.71893	5.64506	8.26e-09
AC007620.3	28.8172	13.2496	2.75973	2.17494	5.64097	8.45e-09
UBE3A	139.225	81.5439	10.233	1.70736	5.6368	8.66e-09
DARS	134.712	77.3539	10.1818	1.7415	5.63333	8.84e-09
ZNF830	19.4429	9.54778	1.75687	2.03638	5.63225	8.89e-09
NEDD8	156.238	87.6829	12.1733	1.78185	5.63154	8.93e-09
MFSD1	156.238	78.5299	13.8016	1.98953	5.63033	8.99e-09
PPP3R1	92.701	53.413	6.98018	1.73555	5.6285	9.09e-09
CBR4	23.6092	11.8121	2.09648	1.99874	5.62713	9.16e-09
PDE7A	39.5802	14.1241	4.52435	2.80232	5.62647	9.2e-09
GLO1	197.901	112.479	15.1828	1.75944	5.62622	9.21e-09
RING1	15.6238	42.0468	4.69834	0.37158	-5.62392	9.33e-09
STX18	52.0792	31.0368	3.74566	1.67798	5.61781	9.67e-09
AC004538.3	1.38878	0.253807	0.202062	5.47179	5.61695	9.72e-09
IMPAD1	262.479	148.962	20.2105	1.76205	5.61674	9.73e-09
PAPOLA	277.408	169.581	19.2383	1.63585	5.60486	1.04e-08
ZC3H12D	0.694389	0.146114	0.0978588	4.75237	5.60271	1.06e-08
MAK	0.694389	0.158588	0.0956702	4.37858	5.60051	1.07e-08
Y_RNA	0.347195	0.0675916	0.0499609	5.13665	5.59644	1.09e-08
SAP30BP	63.5366	35.5172	5.00698	1.7889	5.59607	1.1e-08
SPAG9	270.465	139.885	23.3508	1.93348	5.59208	1.12e-08
EIF2S1	169.084	90.5097	14.0617	1.86813	5.58782	1.15e-08
ITSN2	61.1063	27.3645	6.03951	2.23305	5.58683	1.16e-08
MOB1B	87.8402	44.8085	7.70884	1.96035	5.58213	1.19e-08
MIR1539	0.347195	0.0619219	0.0511388	5.60698	5.5784	1.21e-08
MED27	4.16634	15.8745	2.09948	0.262454	-5.57671	1.23e-08
SLTM	130.892	65.2459	11.7763	2.00614	5.57445	1.24e-08
RP1-12G14.7	1.38878	0.400301	0.177323	3.46933	5.57443	1.24e-08
RP11-321F8.4	0.347195	0.0748159	0.048896	4.64065	5.57058	1.27e-08
AMBRA1	7.29109	21.162	2.49244	0.344538	-5.56518	1.31e-08
RSRC1	51.0376	21.1981	5.36202	2.40765	5.56497	1.31e-08
UBE2K	123.601	74.5697	8.82416	1.65753	5.55652	1.38e-08
UBE2V2	111.797	60.7662	9.18679	1.83978	5.55477	1.39e-08
RP11-120K9.2	1.38878	0.495496	0.160827	2.8028	5.55431	1.39e-08
PHB2	41.6634	117.639	13.6837	0.354164	-5.55223	1.41e-08
RP11-262H14.11	1.38878	0.269287	0.201918	5.15724	5.54429	1.48e-08
MLK4	1.04158	0.170475	0.157219	6.10987	5.54073	1.51e-08
ACP2	7.63828	26.3286	3.37793	0.290113	-5.53307	1.57e-08
2019-03-06	193.387	110.009	15.0714	1.75792	5.53221	1.58e-08
POLK	54.8567	29.3711	4.61099	1.86771	5.52715	1.63e-08
HPS3	49.3016	25.4983	4.30705	1.93353	5.52661	1.63e-08
RP11-503P10.1	0.347195	0.0636367	0.0513097	5.45588	5.5264	1.63e-08
SLC35C1	5.55511	28.9172	4.22929	0.192104	-5.52389	1.66e-08
N4BP2L2	102.075	50.8934	9.2662	2.00567	5.5235	1.66e-08
PAPD5	40.6218	23.1856	3.159	1.75203	5.51953	1.7e-08
XIAP	92.3538	57.3219	6.34954	1.61114	5.51724	1.72e-08
CTC-308K20.3	0.694389	0.13063	0.102263	5.31568	5.51286	1.77e-08
RELA	24.3036	70.9888	8.47376	0.342358	-5.50939	1.8e-08
CTC-260E6.10	0.694389	0.133629	0.101802	5.19639	5.50833	1.81e-08
CUL1	104.506	66.0813	6.97618	1.58147	5.50793	1.82e-08
FGF13	26.0396	4.27034	3.95238	6.09778	5.50788	1.82e-08
RP11-177B4.1	0.347195	0.0642954	0.0513699	5.39999	5.5071	1.82e-08
USP25	98.9505	52.5101	8.43444	1.88441	5.50604	1.83e-08
AC007228.11	1.38878	0.426703	0.174827	3.25467	5.503	1.87e-08
RP11-250B2.5	1.38878	0.364865	0.186165	3.80629	5.50004	1.9e-08
EHHADH	14.9294	6.46956	1.54047	2.30763	5.49169	1.99e-08
ETFDH	46.1769	21.562	4.48574	2.14159	5.48736	2.04e-08
MIR21	2.08317	0.406008	0.30577	5.13085	5.48503	2.07e-08
EIF1AXP1	1.73597	0.414361	0.240981	4.18952	5.4843	2.08e-08
RPS7P3	0.347195	0.0689473	0.0507444	5.03565	5.48331	2.09e-08
RP11-214K3.24	0.694389	0.194467	0.0911752	3.57073	5.48309	2.09e-08
BLCAP	104.506	66.2008	6.98876	1.57862	5.48091	2.12e-08
ODF2L	57.9815	25.0646	6.01191	2.31328	5.47529	2.18e-08
AKAP9	63.1894	32.3951	5.62467	1.95058	5.47486	2.19e-08
TRMT13	32.9835	14.0163	3.46637	2.35323	5.47179	2.23e-08
TMEFF1	43.0521	13.4546	5.40901	3.1998	5.47188	2.23e-08
FRA10AC1	36.4554	17.9623	3.38106	2.02955	5.46963	2.25e-08
ENTPD4	117.699	67.1106	9.24843	1.75381	5.46994	2.25e-08
RP11-477D19.2	1.73597	0.524573	0.221533	3.30931	5.46826	2.27e-08
RP11-452L6.7	0.347195	0.0777435	0.0492994	4.4659	5.4656	2.31e-08
RP13-15M17.1	0.347195	0.0720123	0.0503925	4.82132	5.46078	2.37e-08
LSM10	4.16634	18.681	2.65856	0.223025	-5.4596	2.39e-08
KLHL2	47.2185	21.9578	4.63217	2.15042	5.45332	2.47e-08
ADAMTS5	426.355	111.859	57.6935	3.81155	5.45116	2.5e-08
ANKRD13C	63.5366	37.8128	4.71961	1.68029	5.45041	2.51e-08
PSIP1	198.595	76.6623	22.3765	2.59052	5.44916	2.53e-08
RP11-54D18.2	1.38878	0.341683	0.192236	4.06452	5.44693	2.56e-08
PHF3	136.1	65.5991	12.9494	2.07473	5.44436	2.6e-08
CALU	2885.88	1534.02	248.309	1.88126	5.44428	2.6e-08
C1orf216	63.1894	34.3166	5.30386	1.84137	5.44374	2.61e-08
CTD-2128A3.2	0.347195	0.0600693	0.0527515	5.7799	5.44298	2.62e-08
RP1-86C11.7	0.694389	0.130515	0.10368	5.32037	5.4386	2.69e-08
UBE2FP3	0.694389	0.179086	0.0947751	3.87742	5.43712	2.71e-08
SDHAF2	11.1102	22.2304	2.04582	0.499776	-5.43555	2.73e-08
ARFIP2	13.8878	42.1506	5.2053	0.32948	-5.42962	2.82e-08
MYH13	1.04158	0.154132	0.163524	6.75773	5.42703	2.86e-08
INPP1	31.2475	18.8542	2.28357	1.65732	5.42715	2.86e-08
RP11-261C10.5	0.694389	0.170719	0.0966634	4.06744	5.41746	3.02e-08
ZNF560	3.12475	0.71751	0.444453	4.35499	5.41619	3.04e-08
POLR3F	18.7485	10.4498	1.53247	1.79415	5.41527	3.06e-08
SLK	174.639	90.8863	15.4688	1.92151	5.41431	3.08e-08
MIR641	0.347195	0.0664775	0.0518474	5.22274	5.41429	3.08e-08
DACT3-AS1	0.694389	0.169618	0.0969292	4.09385	5.41397	3.08e-08
RAB10	220.469	147.399	13.5035	1.49573	5.4112	3.13e-08
SETD7	341.64	203.262	25.5778	1.68078	5.41005	3.15e-08
SLC25A24	107.283	61.6087	8.45365	1.74136	5.40292	3.28e-08
NDUFS6	42.0105	19.5347	4.16037	2.15056	5.40238	3.29e-08
DOCK7	176.722	102.043	13.8285	1.73184	5.40039	3.32e-08
ARHGAP4	2.77756	0.745782	0.376417	3.72436	5.39767	3.38e-08
SLC12A2	43.7465	22.4687	3.94562	1.94699	5.39276	3.47e-08
RP5-1112D6.8	1.73597	0.502164	0.228824	3.45698	5.39196	3.48e-08
TYW3	54.5096	28.6884	4.7891	1.90006	5.39165	3.49e-08
NAA30	46.8713	27.8073	3.53627	1.68557	5.39099	3.5e-08
RP11-15E18.1	0.347195	0.0732645	0.0508197	4.73892	5.39023	3.52e-08
UBE2Q2P1	6.5967	2.37701	0.782896	2.7752	5.38984	3.53e-08
MTX2	54.5096	33.0164	3.98913	1.65098	5.38793	3.56e-08
FBXO45	28.8172	15.6961	2.43647	1.83594	5.38525	3.62e-08
SSR2	84.0211	227.974	26.7516	0.368555	-5.38112	3.7e-08
RP11-430L17.1	0.347195	0.0708346	0.0513954	4.90148	5.37713	3.78e-08
ATP6V1G3	2.77756	0.61536	0.402148	4.51371	5.37663	3.79e-08
TMEM165	167.348	90.6946	14.2592	1.84518	5.3757	3.81e-08
TMEM168	52.0792	30.0926	4.0924	1.73063	5.37255	3.88e-08
RPF2	57.6343	29.1892	5.29507	1.97451	5.372	3.89e-08
GPBP1	107.283	56.8638	9.38789	1.88667	5.37068	3.92e-08
GNAQ	155.196	90.2086	12.1003	1.72041	5.37074	3.92e-08
EAF1	32.2891	17.9147	2.67792	1.80238	5.36776	3.99e-08
ZNF705E	0.347195	0.0667755	0.0522425	5.19943	5.36765	3.99e-08
ZNF148	87.8402	54.161	6.27601	1.62183	5.36634	4.02e-08
RP11-265E18.1	0.347195	0.068476	0.0519664	5.07031	5.36344	4.08e-08
TMEM167A	257.271	144.563	21.0201	1.77965	5.36191	4.12e-08
PSMC1P1	3.12475	0.796226	0.434285	3.92445	5.36174	4.12e-08
YAF2	22.5677	13.3409	1.72118	1.69162	5.36074	4.14e-08
SNORA21	0.347195	0.0726986	0.0512177	4.77581	5.3594	4.17e-08
IFIT2	43.3993	10.6584	6.11238	4.07185	5.3565	4.24e-08
GMFB	209.011	112.902	17.9515	1.85126	5.35382	4.31e-08
CCDC88B	2.43036	0.691897	0.324787	3.51261	5.35263	4.33e-08
CLN5	60.4119	30.8531	5.52484	1.95805	5.35015	4.39e-08
BAZ1B	204.845	115.278	16.7469	1.77696	5.34823	4.44e-08
ARMCX1	87.1458	38.5717	9.08223	2.25932	5.34826	4.44e-08
LEMD3	44.4409	25.2535	3.58794	1.7598	5.34776	4.45e-08
UEVLD	48.2601	29.3643	3.53359	1.64349	5.34745	4.46e-08
RP4-717I23.2	0.347195	0.0699926	0.0518825	4.96045	5.34288	4.57e-08
SNHG6	60.0647	29.0229	5.81088	2.06956	5.342	4.6e-08
CEBPZ-AS1	69.0917	41.6239	5.14618	1.6599	5.33751	4.71e-08
TMEM219	16.6653	50.8679	6.40922	0.32762	-5.33646	4.74e-08
MON1A	1.38878	9.28659	1.48031	0.149547	-5.33524	4.77e-08
PTCD1	2.08317	11.6004	1.78408	0.179577	-5.33453	4.79e-08
UTP11L	63.5366	33.4132	5.64971	1.90154	5.33185	4.86e-08
PTBP3	157.279	85.1226	13.5382	1.84768	5.32985	4.91e-08
ZNF76	4.86072	17.3449	2.34259	0.28024	-5.3292	4.93e-08
OTUD5	25.6924	50.8058	4.71224	0.505698	-5.32941	4.93e-08
RP6-99M1.3	1.04158	0.192939	0.159261	5.3985	5.32865	4.95e-08
ZNF419	16.3181	6.70148	1.80577	2.43501	5.32553	5.03e-08
UCHL5	42.0105	22.4035	3.68343	1.87517	5.32303	5.1e-08
PRPF4B	129.504	68.0892	11.5454	1.90197	5.31939	5.21e-08
AGPS	118.393	66.6514	9.72969	1.77631	5.31794	5.25e-08
BDP1	79.8548	44.0306	6.73815	1.81362	5.31662	5.29e-08
SNAPC1	56.5927	24.8756	5.96743	2.27503	5.31505	5.33e-08
RP4-614O4.12	2.08317	0.536606	0.291128	3.88211	5.3123	5.41e-08
BCLAF1	297.199	157.456	26.3307	1.8875	5.3072	5.57e-08
PDHX	33.3307	19.9775	2.51609	1.66841	5.30714	5.57e-08
SMC5	88.8818	48.4038	7.62747	1.83626	5.30687	5.58e-08
USP45	28.8172	15.3546	2.53714	1.87678	5.30622	5.6e-08
PUM2	147.905	88.7562	11.1554	1.66642	5.30225	5.72e-08
ST13P4	1.04158	0.242947	0.150668	4.28729	5.30063	5.77e-08
ZNF431	9.72145	4.81941	0.925396	2.01715	5.29724	5.88e-08
STAG1	130.198	65.7503	12.1768	1.98019	5.29267	6.03e-08
NUDT16	87.493	40.4559	8.88982	2.16268	5.29113	6.08e-08
RCSD1	1.38878	0.179648	0.228639	7.73057	5.28839	6.17e-08
WAPAL	93.3954	54.9832	7.2738	1.69862	5.28089	6.43e-08
ADAM8	2.77756	0.818286	0.371065	3.39436	5.28013	6.45e-08
TADA3	34.7195	83.8744	9.31458	0.413946	-5.27721	6.56e-08
DDT	0.694389	8.85375	1.54671	0.0784289	-5.27532	6.63e-08
HSPA9P1	1.04158	0.217765	0.156165	4.78306	5.27532	6.63e-08
VPS26B	30.2059	64.46	6.49465	0.4686	-5.27419	6.67e-08
RP11-479G22.8	20.8317	6.49781	2.72207	3.20595	5.2658	6.98e-08
VAMP7	104.506	67.3311	7.06868	1.55211	5.25904	7.24e-08
UBXN8	17.3597	9.28892	1.53483	1.86886	5.25843	7.26e-08
ZC3H7A	104.853	64.3696	7.70894	1.62892	5.25146	7.55e-08
NHLRC2	33.6779	18.8615	2.8235	1.78554	5.24753	7.71e-08
CRNKL1	47.2185	29.7716	3.32529	1.58602	5.24672	7.74e-08
SGTB	73.6053	33.1476	7.71474	2.22053	5.2442	7.85e-08
RSRC2	82.6323	44.574	7.25762	1.85382	5.24391	7.86e-08
ARHGAP12	172.903	69.0653	19.8022	2.50347	5.24374	7.87e-08
RP11-284N8.3	1.38878	0.215628	0.223789	6.44061	5.24221	7.93e-08
RP11-214K3.20	0.347195	0.0670893	0.0534753	5.17512	5.23803	8.11e-08
PRKRIR	114.227	63.2075	9.74456	1.80718	5.2357	8.22e-08
ZNF582	4.51353	2.02543	0.475237	2.22843	5.23549	8.23e-08
PMS2P4	2.77756	1.33169	0.276447	2.08574	5.23017	8.47e-08
PELP1	51.0376	27.7689	4.44913	1.83794	5.22996	8.48e-08
LRRFIP2	181.236	74.2325	20.4611	2.44146	5.22958	8.49e-08
MOB4	81.2435	46.7913	6.58919	1.7363	5.22861	8.54e-08
ITSN1	132.628	71.7882	11.64	1.8475	5.22681	8.62e-08
TCEB1	77.7716	42.6284	6.72494	1.82441	5.2258	8.67e-08
TRAF7	27.0812	79.7164	10.0838	0.339719	-5.2198	8.96e-08
RP11-355O1.11	2.77756	0.788683	0.381029	3.52176	5.21974	8.96e-08
ZNF84	2.43036	0.871749	0.298618	2.78792	5.21943	8.97e-08
COX4I1	92.701	162.46	13.3662	0.570606	-5.21908	8.99e-08
KIAA1033	166.653	97.5192	13.2472	1.70893	5.21876	9.01e-08
GLUD1P3	2.43036	0.96135	0.281501	2.52807	5.21849	9.02e-08
CTB-51J22.1	1.38878	0.428695	0.184036	3.23955	5.21682	9.1e-08
RP11-219C20.3	0.347195	0.0786596	0.051506	4.41389	5.21366	9.26e-08
ZCRB1	74.2996	38.6134	6.84732	1.92419	5.21171	9.36e-08
SPCS2	77.7716	49.4274	5.43889	1.57345	5.21138	9.37e-08
IFT74	30.5531	13.4261	3.28659	2.27566	5.2112	9.38e-08
MARCKS	1142.27	524.651	118.518	2.1772	5.2112	9.38e-08
WHAMMP3	11.4574	4.86114	1.26634	2.35694	5.20895	9.5e-08
TXNRD1	1298.86	463.631	160.446	2.80149	5.20564	9.67e-08
MKRN1	131.934	70.7481	11.7544	1.86484	5.20534	9.68e-08
AC010878.3	0.694389	0.1263	0.109176	5.49795	5.20342	9.78e-08
AC005255.3	1.04158	0.396325	0.124005	2.6281	5.2035	9.78e-08
FBXO11	81.9379	48.047	6.52172	1.70537	5.19663	1.01e-07
LINC00888	6.5967	2.56305	0.776231	2.57377	5.19646	1.02e-07
C21orf91	31.5947	15.4929	3.10016	2.0393	5.19386	1.03e-07
SMU1	94.4369	63.7158	5.91752	1.48216	5.19156	1.04e-07
FAM204A	57.9815	33.9201	4.63619	1.70936	5.18992	1.05e-07
GLOD4	56.2455	35.0208	4.08915	1.60606	5.19049	1.05e-07
AC032027.1	0.347195	0.0718846	0.0530473	4.82989	5.18989	1.05e-07
PSG5	576.343	111.836	89.537	5.15348	5.18788	1.06e-07
RP11-1151B14.4	5.90231	1.61616	0.828792	3.65206	5.17156	1.16e-07
FAM172A	62.1478	34.6663	5.31636	1.79275	5.16924	1.18e-07
PTPRCAP	1.38878	0.332388	0.204442	4.17819	5.1672	1.19e-07
FAM76B	21.8733	11.6752	1.97499	1.87349	5.16363	1.21e-07
ARMC1	57.6343	34.3255	4.51367	1.67905	5.16404	1.21e-07
UGGT1	230.537	136.062	18.3084	1.69435	5.1602	1.23e-07
RP3-327A19.5	2.77756	0.92105	0.359779	3.01564	5.16013	1.23e-07
RP11-864I4.4	0.347195	0.0820942	0.0513789	4.22922	5.15972	1.24e-07
SNORA81	0.347195	0.0803983	0.051755	4.31843	5.15499	1.27e-07
SEPT7P9	0.347195	0.0699682	0.0537903	4.96218	5.15384	1.28e-07
NMT2	45.8297	22.67	4.49462	2.0216	5.15277	1.28e-07
MRPL19	57.6343	32.4508	4.89001	1.77605	5.14999	1.3e-07
RARS2	90.965	53.7991	7.21568	1.69083	5.15072	1.3e-07
RPS10	111.449	450.076	65.7663	0.247624	-5.14894	1.31e-07
DRG2	9.37425	23.6204	2.76748	0.396872	-5.14768	1.32e-07
FBXO3	55.5511	30.6905	4.83053	1.81004	5.14656	1.33e-07
OPA1	114.227	67.7505	9.03101	1.686	5.14633	1.33e-07
ETAA1	32.9835	15.7315	3.35327	2.09665	5.14483	1.34e-07
EVI2A	28.47	5.29856	4.50833	5.37315	5.13968	1.38e-07
MAP7D3	112.838	44.7393	13.2528	2.52213	5.13845	1.39e-07
FBXL3	92.3538	55.4582	7.18359	1.66529	5.13609	1.4e-07
CAPZA1	335.39	187.396	28.8153	1.78974	5.13596	1.4e-07
CTD-3099C6.11	1.38878	0.39536	0.193404	3.51269	5.13648	1.4e-07
MATR3	492.322	295.142	38.4121	1.66808	5.13328	1.42e-07
CFL2	349.972	143.933	40.1393	2.4315	5.13311	1.42e-07
NDUFA1	76.0356	44.6588	6.11618	1.70259	5.13013	1.45e-07
FITM2	27.4284	16.2329	2.18277	1.68968	5.12904	1.46e-07
SLC25A46	127.768	71.3277	11.0083	1.79128	5.12702	1.47e-07
CTA-246H3.11	0.694389	0.140901	0.107941	4.92821	5.12771	1.47e-07
CLDND1	86.1043	48.7911	7.28993	1.76475	5.11845	1.54e-07
CDK9	12.1518	30.4975	3.58433	0.398452	-5.11831	1.54e-07
PRPF3	58.3287	28.6449	5.80075	2.03626	5.11723	1.55e-07
KCTD18	39.9274	22.6553	3.37714	1.76239	5.11442	1.57e-07
CTD-2554C21.2	1.04158	0.2312	0.158523	4.50511	5.11208	1.59e-07
LIN54	28.1228	14.4689	2.67159	1.94367	5.11075	1.6e-07
HNRNPM	297.546	120.155	34.7375	2.47636	5.10663	1.64e-07
ANP32E	129.504	44.1373	16.7154	2.93411	5.10703	1.64e-07
RP11-488L18.10	5.20792	1.858	0.655987	2.80297	5.10668	1.64e-07
LNPEP	82.2851	44.2098	7.4583	1.86124	5.10509	1.65e-07
OSTM1	108.672	46.0738	12.2653	2.35865	5.10368	1.67e-07
RP11-621L6.2	0.347195	0.0694237	0.0544684	5.00109	5.09967	1.7e-07
SLC2A13	25.3452	11.9831	2.62045	2.11508	5.09918	1.71e-07
RNF14	94.7841	55.0368	7.7966	1.7222	5.09803	1.72e-07
HUS1	24.3036	14.7134	1.88175	1.6518	5.09644	1.73e-07
TCEAL1	27.4284	13.6009	2.7143	2.01666	5.09432	1.75e-07
PABPC1	1953.32	1036.7	179.974	1.88417	5.09305	1.76e-07
ANP32A	137.142	59.5434	15.2367	2.30322	5.09286	1.76e-07
DDR2	1022.84	513.195	100.096	1.99307	5.09151	1.78e-07
MED4-AS1	0.347195	0.0826535	0.0519629	4.2006	5.09096	1.78e-07
PHF6	51.3848	28.0586	4.58397	1.83134	5.08864	1.8e-07
TGS1	35.4139	18.6723	3.29053	1.89659	5.08778	1.81e-07
SAR1A	313.864	192.561	23.8481	1.62995	5.0865	1.82e-07
TCTE3	0.347195	0.0784057	0.0528733	4.42818	5.08364	1.85e-07
SERINC3	431.216	223.06	40.9651	1.93318	5.0813	1.87e-07
C5orf15	138.531	86.7586	10.1914	1.59674	5.07999	1.89e-07
LCA5	21.5261	9.76085	2.31637	2.20535	5.07917	1.9e-07
RBM12B	27.4284	15.2512	2.39823	1.79844	5.07756	1.91e-07
C10orf131	0.347195	0.0790142	0.0528225	4.39408	5.07701	1.92e-07
PRKAG2	54.8567	25.1132	5.86246	2.18438	5.07356	1.95e-07
RP11-169K16.7	10.0686	4.35312	1.12738	2.31297	5.06974	1.99e-07
C9orf64	37.1498	20.4495	3.29661	1.81666	5.0659	2.03e-07
PYURF	1.04158	7.80439	1.33561	0.133461	-5.06347	2.06e-07
RPL4P5	4.51353	1.21549	0.651382	3.71333	5.06314	2.06e-07
RP11-769O8.3	0.347195	0.0696318	0.0548187	4.98615	5.06328	2.06e-07
CSNK2B	26.734	71.941	8.93142	0.37161	-5.06157	2.08e-07
DNAJC3	158.668	88.781	13.8126	1.78718	5.05964	2.1e-07
RP11-416N2.4	0.694389	0.150862	0.107456	4.6028	5.05813	2.12e-07
AC002477.1	0.347195	0.0713853	0.0545493	4.86367	5.05615	2.14e-07
KCTD9	147.558	76.3745	14.0813	1.93203	5.05516	2.15e-07
SLC25A11	7.29109	29.9808	4.48818	0.243192	-5.05543	2.15e-07
EIF5A2	37.497	18.5403	3.75002	2.02246	5.0551	2.15e-07
POLR2G	21.5261	41.7137	3.99555	0.516043	-5.05253	2.18e-07
SLC25A30	42.0105	19.9555	4.36618	2.10521	5.05133	2.19e-07
SMARCA2	380.872	147.423	46.2203	2.58353	5.0508	2.2e-07
SYNC	114.921	48.5126	13.1489	2.3689	5.05052	2.2e-07
PCNPP1	0.347195	0.0960306	0.049729	3.61546	5.05065	2.2e-07
RABGGTB	83.6739	43.591	7.94121	1.91952	5.04745	2.24e-07
ZNF197	32.6363	18.8093	2.74015	1.73511	5.04608	2.25e-07
ZRANB2-AS2	0.694389	0.215238	0.0949558	3.22615	5.04604	2.26e-07
ERAL1	11.8046	32.0749	4.01914	0.368032	-5.04346	2.29e-07
PNCK	0.694389	0.137493	0.11044	5.05036	5.04254	2.3e-07
AAR2	14.5822	38.5676	4.7573	0.378094	-5.04181	2.31e-07
C5orf27	0.347195	0.0688882	0.0552406	5.03997	5.03808	2.35e-07
C5orf22	40.2746	23.3588	3.35862	1.72417	5.03654	2.37e-07
REST	70.8277	43.6193	5.40232	1.62377	5.03643	2.37e-07
RP1-30M3.6	0.347195	0.0771382	0.0536231	4.50094	5.03619	2.37e-07
TTC33	17.3597	9.04795	1.6505	1.91864	5.03593	2.38e-07
KIF5B	475.657	258.898	43.0871	1.83724	5.0307	2.44e-07
TEX261	38.1914	114.501	15.1703	0.333547	-5.03019	2.45e-07
PIK3R1	141.308	52.9178	17.5739	2.67033	5.02963	2.46e-07
PVRL3	122.213	47.1491	14.9267	2.59205	5.0288	2.47e-07
CROT	28.1228	14.3346	2.74337	1.96188	5.026	2.5e-07
GRSF1	181.236	104.921	15.1885	1.72735	5.02448	2.52e-07
ZDHHC16	7.29109	30.7951	4.67912	0.236761	-5.02318	2.54e-07
PSENEN	7.63828	27.3413	3.92219	0.279368	-5.02347	2.54e-07
VTA1	97.9089	62.0066	7.14787	1.57901	5.02279	2.55e-07
HSD17B4	133.323	74.957	11.6213	1.77866	5.02233	2.55e-07
SLC23A1	0.694389	0.194916	0.0994597	3.56251	5.02187	2.56e-07
PEX13	36.1082	22.6853	2.67376	1.59171	5.02026	2.58e-07
JAK2	30.5531	14.6708	3.16457	2.08257	5.01878	2.6e-07
RNU1-103P	0.347195	0.0702396	0.0551867	4.943	5.01851	2.6e-07
ACADM	55.8983	33.4184	4.48156	1.67268	5.0161	2.64e-07
CYB5D1	30.2059	17.0324	2.6265	1.77344	5.01563	2.64e-07
MED10	41.3162	25.7948	3.09469	1.60172	5.01547	2.65e-07
PIN4P1	0.347195	0.0701063	0.055252	4.9524	5.01499	2.65e-07
PDS5A	160.751	104.891	11.1399	1.53255	5.01436	2.66e-07
TMEM60	23.6092	12.7073	2.17405	1.85792	5.01455	2.66e-07
NDUFAF4	17.7069	9.89399	1.55863	1.78967	5.01269	2.68e-07
AF230666.2	1.04158	0.36495	0.134973	2.85404	5.01309	2.68e-07
ZNF654	32.2891	17.4035	2.97184	1.85532	5.00887	2.74e-07
ZMYM6	31.9419	19.5582	2.47466	1.63317	5.0042	2.8e-07
ZBTB18	36.1082	14.3346	4.35233	2.51895	5.00275	2.83e-07
SH2D4A	204.498	67.5321	27.3815	3.02816	5.00211	2.84e-07
AFTPH	49.3016	28.2941	4.19983	1.74247	5.002	2.84e-07
TCEAL7	22.9148	6.06836	3.36958	3.77612	4.99959	2.87e-07
RN7SKP80	0.347195	0.0622255	0.0570125	5.57962	4.99836	2.89e-07
C14orf28	17.0125	8.32834	1.73753	2.04273	4.99803	2.9e-07
EFCAB1	1.73597	0.439914	0.259446	3.94617	4.99549	2.93e-07
ATP11C	110.061	56.4291	10.7353	1.95042	4.99582	2.93e-07
ERGIC2	80.5492	46.3212	6.85329	1.73893	4.99438	2.95e-07
EMC4	28.1228	49.335	4.2495	0.570037	-4.99171	2.99e-07
RP11-573M3.3	0.347195	0.067754	0.0560031	5.12434	4.98973	3.02e-07
ZNF141	9.02706	3.24334	1.15973	2.78326	4.98713	3.06e-07
WDR11	107.978	70.6192	7.49226	1.52901	4.98626	3.08e-07
YIPF4	105.2	52.9908	10.4821	1.98525	4.98079	3.17e-07
ANKRD26	31.5947	15.0358	3.32662	2.10129	4.97769	3.22e-07
TAF13	88.1874	41.4189	9.39947	2.12916	4.97566	3.25e-07
PTGR1	88.5346	40.7998	9.59591	2.16998	4.9745	3.27e-07
FNDC3B	377.401	227.623	30.1219	1.658	4.97236	3.31e-07
UBE2Q2	109.713	70.4954	7.88818	1.55632	4.97175	3.32e-07
LINC00886	6.2495	1.98828	0.858193	3.14317	4.96534	3.43e-07
AC007879.4	0.347195	0.0769516	0.054458	4.51186	4.96241	3.48e-07
RSBN1L	28.8172	14.8351	2.82045	1.9425	4.95739	3.57e-07
TUFM	51.0376	98.59	9.59716	0.517676	-4.95484	3.62e-07
KRR1P1	0.347195	0.0736614	0.0552085	4.71339	4.95455	3.62e-07
FAM120C	19.7901	9.89341	1.99812	2.00033	4.95301	3.65e-07
CUEDC2	20.8317	42.466	4.36861	0.49055	-4.95221	3.67e-07
LATS2	191.304	83.686	21.7354	2.28598	4.95129	3.69e-07
RAB4A	41.3162	27.0315	2.88541	1.52844	4.95065	3.7e-07
CTC-336P14.1	0.347195	0.0965682	0.0506537	3.59533	4.94784	3.75e-07
DICER1	92.701	52.3419	8.16168	1.77107	4.94495	3.81e-07
DUT	76.73	35.7515	8.28994	2.1462	4.94316	3.84e-07
IREB2	101.728	65.436	7.34415	1.55462	4.94163	3.87e-07
SMARCD1	21.8733	50.1513	5.72491	0.436145	-4.93948	3.92e-07
YTHDF3	147.558	95.8993	10.4599	1.53867	4.9387	3.93e-07
RNU6-529P	0.347195	0.0689354	0.0563389	5.03652	4.93903	3.93e-07
MTERF	13.1934	7.94302	1.06362	1.661	4.9363	3.98e-07
ORMDL1	84.0211	46.7737	7.54703	1.79633	4.93537	4e-07
CFLAR-AS1	0.694389	0.164591	0.10754	4.21888	4.9265	4.19e-07
ANAPC4	35.761	21.3396	2.92938	1.67581	4.92303	4.26e-07
LA16c-306A4.1	0.694389	0.212299	0.0979597	3.27081	4.92131	4.3e-07
SMC6	79.8548	41.9499	7.70598	1.90357	4.91889	4.35e-07
RP11-2B6.2	1.38878	0.38855	0.2035	3.57426	4.91514	4.44e-07
MTX1	3.47195	10.1785	1.36463	0.341107	-4.91453	4.45e-07
AUP1	27.7756	68.44	8.27713	0.405838	-4.91286	4.49e-07
LAGE3	0	7.08132	1.44251	0	-4.90904	4.58e-07
SNORD46	0.694389	0.184904	0.103816	3.7554	4.90756	4.61e-07
CHD1	54.1624	28.7029	5.1912	1.887	4.90435	4.69e-07
AC142528.1	0.347195	0.0680125	0.0569294	5.10486	4.904	4.7e-07
RP11-531A24.5	0.694389	0.17257	0.10642	4.02382	4.9034	4.71e-07
SLC33A1	81.5907	45.6438	7.33244	1.78755	4.90245	4.73e-07
SNX4	38.5386	25.1534	2.7309	1.53214	4.9014	4.76e-07
TSC22D2	89.9234	43.2903	9.51494	2.07722	4.90104	4.77e-07
RIF1	88.8818	50.7072	7.79403	1.75284	4.89793	4.84e-07
SRSF4	96.1729	55.7759	8.24774	1.72427	4.89795	4.84e-07
YWHAZP2	1.73597	0.404911	0.271779	4.2873	4.89759	4.85e-07
RBM34	1.73597	0.812167	0.188653	2.13746	4.89684	4.87e-07
EIF4G3	209.011	135.513	15.0113	1.54238	4.89623	4.88e-07
CEP135	22.9148	11.3558	2.36288	2.01791	4.89194	4.99e-07
RP3-508I15.10	0.347195	0.070338	0.0566105	4.93609	4.89055	5.03e-07
EIF2S2	381.22	209.218	35.1823	1.82212	4.88886	5.07e-07
DNAJC6	21.5261	4.03219	3.57926	5.33855	4.88756	5.1e-07
CASD1	31.5947	16.5303	3.0828	1.91132	4.88662	5.13e-07
Y_RNA	0.347195	0.0736293	0.056024	4.71544	4.883	5.22e-07
B3GAT2	1.04158	0.325058	0.146805	3.2043	4.88078	5.28e-07
SOAT1	122.907	62.1245	12.4608	1.9784	4.8779	5.36e-07
SCAF4	43.7465	24.444	3.95811	1.78966	4.8767	5.39e-07
C1D	30.9003	19.1779	2.40644	1.61125	4.87127	5.54e-07
CCM2	12.8462	43.2798	6.2514	0.296817	-4.86829	5.63e-07
DPAGT1	10.0686	28.3591	3.75921	0.355041	-4.8655	5.71e-07
CNTLN	35.0667	16.0818	3.90221	2.18051	4.86515	5.72e-07
VMA21	59.7175	37.419	4.58333	1.59591	4.86513	5.72e-07
RP11-395B7.7	63.5366	27.6422	7.38032	2.29854	4.86353	5.77e-07
UGCG	440.243	153.207	59.0505	2.87352	4.86086	5.84e-07
TP73-AS1	49.3016	23.2608	5.35737	2.11952	4.86075	5.85e-07
GFRA1	202.414	47.2555	31.9247	4.28341	4.86015	5.86e-07
PECR	9.02706	4.1724	0.999073	2.16352	4.85917	5.89e-07
SRSF1	345.459	157.126	38.7561	2.19861	4.85942	5.89e-07
ABCA5	51.732	17.5836	7.02723	2.94206	4.85944	5.89e-07
CEP120	43.3993	24.8789	3.81308	1.74442	4.85708	5.96e-07
LY6K	12.499	1.79807	2.20344	6.95134	4.85648	5.97e-07
RAB3GAP2	80.8963	51.5525	6.04265	1.5692	4.85611	5.99e-07
PIGU	5.20792	14.2237	1.85697	0.366144	-4.85511	6.02e-07
MRPS2	7.29109	24.8439	3.61607	0.293476	-4.85412	6.05e-07
C16orf93	1.04158	0.339405	0.144657	3.06885	4.85411	6.05e-07
DYNC2H1	98.2561	40.9329	11.814	2.40042	4.85214	6.11e-07
C4orf27	35.0667	18.86	3.34338	1.85932	4.8474	6.25e-07
TMBIM6	943.675	602.215	70.4884	1.56701	4.84419	6.36e-07
DPY19L4	100.339	49.4762	10.5022	2.02803	4.84309	6.39e-07
LYRM2	60.0647	35.3561	5.10199	1.69885	4.84294	6.4e-07
C15orf37	0.694389	0.197668	0.102586	3.51291	4.842	6.43e-07
C12orf75	628.075	210.619	86.2846	2.98205	4.83813	6.55e-07
CYCSP24	0.347195	0.0782456	0.0556633	4.43724	4.83172	6.77e-07
WDR43	84.0211	43.4571	8.39759	1.93343	4.83043	6.81e-07
ZNF583	10.4158	5.59836	0.997289	1.86052	4.83057	6.81e-07
TAF7	144.086	88.5869	11.4936	1.62649	4.82866	6.87e-07
COPS2	162.834	96.1207	13.8192	1.69406	4.82759	6.91e-07
UBR5	160.404	105.937	11.2837	1.51414	4.82699	6.93e-07
BTBD3	46.5241	21.5614	5.17132	2.15775	4.82714	6.93e-07
SPATA2	2.43036	9.87154	1.54215	0.246199	-4.82521	6.99e-07
snoU13	0.347195	0.068692	0.057723	5.05437	4.82481	7.01e-07
SPEF2	13.5406	5.12977	1.74422	2.63961	4.8221	7.1e-07
PPP2R5E	89.229	56.4076	6.80615	1.58186	4.82231	7.1e-07
ZFP2	2.77756	0.967036	0.375533	2.87224	4.8212	7.13e-07
IKBKG	0.694389	5.45058	0.986596	0.127397	-4.82081	7.15e-07
NUDT9	38.1914	23.3242	3.08516	1.63742	4.81894	7.22e-07
AK3	165.612	76.0685	18.5833	2.17714	4.81849	7.23e-07
GSPT2	19.0957	11.5219	1.57199	1.65734	4.81795	7.25e-07
FAAH	2.77756	0.991451	0.370879	2.80151	4.81587	7.33e-07
THOC7	61.8006	39.2083	4.69207	1.57621	4.81501	7.36e-07
RP1-203P18.1	0.347195	0.0734756	0.0568541	4.72531	4.81441	7.38e-07
NDNL2	36.1082	23.4169	2.63887	1.54197	4.80938	7.57e-07
CSNK1A1	301.365	176.081	26.0532	1.71151	4.80877	7.59e-07
FRAT2	8.33267	3.49646	1.00647	2.38317	4.80512	7.73e-07
ATP11B	166.306	98.0684	14.2196	1.69582	4.79884	7.98e-07
CCDC12	24.3036	13.5468	2.24156	1.79405	4.79882	7.98e-07
RAB12	74.2996	44.7209	6.16462	1.66141	4.79814	8.01e-07
ZNF621	50.6904	28.2258	4.68257	1.79589	4.7975	8.03e-07
PPP1R15A	410.384	167.485	50.6479	2.45027	4.79583	8.1e-07
KIAA1430	117.005	70.6671	9.6694	1.65572	4.79218	8.25e-07
TIAL1	95.1313	63.6245	6.578	1.4952	4.78972	8.35e-07
LYSMD2	8.33267	3.07989	1.09672	2.70551	4.78953	8.36e-07
IBTK	160.751	96.9337	13.3344	1.65836	4.78591	8.51e-07
ANKRD36	7.29109	2.97293	0.902247	2.45249	4.786	8.51e-07
MMADHC	127.073	79.7921	9.88322	1.59255	4.78398	8.59e-07
NARS	356.916	217.67	29.1284	1.63971	4.78043	8.75e-07
CTC-444N24.13	0.347195	0.0742921	0.0570887	4.67337	4.78032	8.75e-07
TLE1P1	0.347195	0.0814797	0.0555915	4.26112	4.77978	8.77e-07
MAP4K3	60.4119	36.8207	4.93586	1.64071	4.77955	8.78e-07
APPBP2	88.8818	52.8982	7.52851	1.68024	4.77965	8.78e-07
ADSL	22.5677	49.1095	5.55569	0.459538	-4.77741	8.88e-07
RP4-553F4.6	0.694389	0.18943	0.105702	3.66568	4.77718	8.89e-07
B4GALT4	75.3412	38.2527	7.76436	1.96957	4.77677	8.91e-07
ERI3	19.0957	39.1129	4.1968	0.48822	-4.76962	9.23e-07
OXA1L	27.4284	70.0345	8.93321	0.391641	-4.76941	9.24e-07
ZRSR2	20.4845	8.79396	2.45183	2.32938	4.76808	9.3e-07
ANXA5	2530.01	1292.55	259.568	1.95738	4.76737	9.33e-07
SPATA5	12.1518	6.03228	1.28415	2.01447	4.76544	9.42e-07
MORC3	66.3142	39.4691	5.6333	1.68016	4.76543	9.42e-07
C7orf57	0.347195	0.066762	0.0588455	5.20048	4.76557	9.42e-07
FAM175A	26.3868	11.7335	3.07618	2.24885	4.76349	9.51e-07
EIF3J-AS1	10.763	5.50345	1.10431	1.95569	4.76278	9.55e-07
VAPB	85.7571	57.0703	6.02837	1.50266	4.75864	9.75e-07
TMEM106B	130.545	67.7486	13.2	1.92691	4.75732	9.81e-07
FAM160B2	9.02706	37.7493	6.03956	0.239132	-4.75568	9.89e-07
WDR60	28.8172	16.073	2.67997	1.7929	4.75535	9.91e-07
PIAS2	27.4284	16.8741	2.22081	1.62547	4.75246	1e-06
ZNF793	6.94389	1.93141	1.05466	3.59524	4.75269	1e-06
KIF21A	12.1518	4.55768	1.59817	2.66623	4.75176	1.01e-06
STX5	20.1373	40.9	4.36996	0.492354	-4.75124	1.01e-06
MTMR7	2.43036	1.08826	0.282633	2.23325	4.74856	1.02e-06
CTD-3131K8.3	0.347195	0.0678321	0.058821	5.11844	4.74937	1.02e-06
RNF40	35.761	71.6988	7.5685	0.498768	-4.74833	1.03e-06
TSFM	30.2059	17.9518	2.58273	1.68261	4.74464	1.04e-06
RP11-495P10.1	0.347195	0.0825553	0.0558133	4.2056	4.74151	1.06e-06
SNRPF	48.6072	22.0012	5.61341	2.2093	4.73974	1.07e-06
RP1-249H1.4	0.347195	0.0786981	0.0566399	4.41173	4.74042	1.07e-06
NONOP2	0.694389	0.21479	0.101181	3.23287	4.74003	1.07e-06
RAB5A	108.325	76.9134	6.63064	1.4084	4.73729	1.08e-06
RGPD3	0.694389	0.213837	0.101449	3.24729	4.73689	1.09e-06
GPR146	1.04158	0.206976	0.176243	5.03238	4.73554	1.09e-06
CYCSP34	0.347195	0.0816267	0.0561044	4.25345	4.73346	1.1e-06
RP11-981P6.1	0.694389	0.185807	0.107416	3.73715	4.73472	1.1e-06
DUS4L	6.5967	3.36848	0.682078	1.95836	4.73292	1.11e-06
TARDBP	203.456	111.326	19.4754	1.82757	4.73058	1.12e-06
GTF2F2	57.2871	23.0617	7.2348	2.48408	4.73067	1.12e-06
RP11-723O4.2	1.04158	0.302669	0.156191	3.44132	4.73084	1.12e-06
RFK	45.1353	23.3239	4.61209	1.93515	4.72918	1.13e-06
RIOK2	55.5511	30.4163	5.31831	1.82636	4.72609	1.14e-06
TAF10	10.763	34.4381	5.00879	0.312533	-4.7267	1.14e-06
CTD-3088G3.8	0.694389	0.142154	0.116835	4.88477	4.72662	1.14e-06
DEF6	2.08317	0.442501	0.347343	4.70772	4.72348	1.16e-06
GOLGB1	185.402	110.075	15.953	1.68432	4.72181	1.17e-06
AF127936.7	11.1102	4.67137	1.36358	2.37837	4.72204	1.17e-06
ZRANB2-AS1	0.347195	0.0773177	0.0571718	4.49049	4.72046	1.18e-06
EMX2	125.684	51.0572	15.8237	2.46164	4.71617	1.2e-06
ABCB7	19.0957	11.7073	1.56975	1.63109	4.70675	1.26e-06
GAB3	3.12475	1.0905	0.432241	2.86543	4.70629	1.26e-06
ZCCHC6	63.1894	33.662	6.27898	1.87717	4.70258	1.28e-06
UBA3	98.2561	61.9369	7.72269	1.58639	4.70291	1.28e-06
CTC-559E9.8	0.694389	0.206515	0.10375	3.36241	4.70241	1.29e-06
SNORA14B	0.347195	0.0788805	0.0571173	4.40153	4.6976	1.32e-06
COX6B1	34.7195	70.6097	7.65201	0.49171	-4.6903	1.36e-06
TBCEL	79.8548	46.1452	7.18632	1.73051	4.6908	1.36e-06
NDUFA13	25.6924	73.0574	10.0964	0.351674	-4.69129	1.36e-06
SCRN3	42.7049	22.881	4.22687	1.86639	4.68998	1.37e-06
PSMD8	30.5531	113.858	17.7705	0.268345	-4.68781	1.38e-06
RP11-712B9.2	1.38878	0.437587	0.20288	3.17372	4.68845	1.38e-06
STYK1	2.43036	0.478768	0.416535	5.07629	4.6853	1.4e-06
GRPEL2	36.8026	18.899	3.82149	1.94733	4.68499	1.4e-06
UBE2R2	122.213	78.7326	9.28328	1.55225	4.68367	1.41e-06
DUSP28	0.347195	2.02278	0.357806	0.171642	-4.68295	1.41e-06
FNTB	5.20792	18.5412	2.84695	0.280883	-4.68336	1.41e-06
STK25	30.9003	78.82	10.2358	0.392037	-4.68159	1.42e-06
USP15	68.0501	41.1545	5.74842	1.65353	4.67879	1.44e-06
MCRS1	12.8462	38.9498	5.58016	0.329814	-4.67793	1.45e-06
RP11-75L1.2	3.47195	1.09262	0.508651	3.17763	4.67772	1.45e-06
MGAT4A	1.04158	0.117627	0.197604	8.85495	4.67581	1.46e-06
MAD2L1BP	5.55511	14.4965	1.91203	0.383203	-4.67639	1.46e-06
RP11-2B6.3	0.694389	0.209953	0.103593	3.30736	4.67632	1.46e-06
RP11-848P1.9	3.12475	1.34488	0.380707	2.32344	4.67517	1.47e-06
CLDN11	1162.06	250.459	195.059	4.63972	4.67347	1.48e-06
TARS	367.332	193.537	37.2037	1.898	4.67145	1.5e-06
GOLIM4	199.29	92.8962	22.7842	2.14529	4.66962	1.51e-06
C10orf88	15.6238	9.34397	1.34528	1.67207	4.66803	1.52e-06
RABIF	5.20792	11.9591	1.44628	0.435476	-4.668	1.52e-06
ANKRA2	28.8172	15.4895	2.85569	1.86043	4.66705	1.53e-06
ARHGAP5	201.72	108.437	19.9965	1.86026	4.665	1.54e-06
UBE2H	263.521	155.667	23.1375	1.69285	4.66142	1.57e-06
KRCC1	75.6884	40.123	7.63115	1.88641	4.66056	1.58e-06
IMMP1L	9.37425	5.82404	0.762197	1.60958	4.65787	1.6e-06
RP11-501C14.7	0.347195	0.0804041	0.0572939	4.31812	4.65652	1.61e-06
CTD-2020K17.3	0.347195	0.0688485	0.0597958	5.04288	4.65494	1.62e-06
RP11-91G21.1	0.347195	0.0780076	0.0578344	4.45078	4.65444	1.62e-06
CIAPIN1	10.4158	28.2522	3.83507	0.368673	-4.65086	1.65e-06
KIAA0825	5.20792	2.31764	0.621426	2.24708	4.65103	1.65e-06
CCDC22	1.73597	10.1134	1.80186	0.171652	-4.64929	1.67e-06
RBPJ	227.412	104.745	26.3948	2.17111	4.64742	1.68e-06
AC138783.12	1.04158	0.239767	0.172547	4.34414	4.64694	1.68e-06
AC013449.1	0.347195	0.0735807	0.0588782	4.71855	4.64712	1.68e-06
CYP1B1	711.402	210.652	107.795	3.37715	4.64539	1.7e-06
DNPEP	14.9294	36.6496	4.67754	0.407355	-4.64351	1.71e-06
PPP3CA	92.701	58.4544	7.377	1.58587	4.64234	1.72e-06
SNX29P2	0.694389	0.157066	0.11576	4.421	4.6417	1.73e-06
RPS6	1708.2	944.363	164.611	1.80884	4.64025	1.74e-06
RP11-603J24.7	2.08317	0.579439	0.324103	3.59515	4.63967	1.74e-06
MRE11A	27.0812	13.2236	2.98689	2.04794	4.63947	1.75e-06
TRA2A	80.202	50.6815	6.36272	1.58247	4.63959	1.75e-06
PRELID1	3.12475	44.4807	8.91473	0.0702496	-4.63906	1.75e-06
SELT	103.464	66.5202	7.96266	1.55538	4.63963	1.75e-06
KIN	18.7485	11.1421	1.64116	1.68267	4.63478	1.79e-06
PHF20L1	100.686	66.2462	7.43672	1.51988	4.6311	1.82e-06
IMPA1	30.9003	17.1087	2.97859	1.80612	4.63026	1.83e-06
ELMOD1	0.694389	0.129725	0.122007	5.35277	4.62814	1.84e-06
UBA6	87.1458	48.001	8.45809	1.8155	4.6281	1.85e-06
FAM199X	45.4825	27.231	3.94399	1.67025	4.62767	1.85e-06
ALG13	42.0105	27.2368	3.19511	1.54242	4.62387	1.88e-06
AP006222.2	2.08317	0.474938	0.347757	4.38619	4.62457	1.88e-06
XPO1	312.128	176.517	29.3338	1.76826	4.62302	1.89e-06
GGPS1	49.996	32.5205	3.77977	1.53737	4.62344	1.89e-06
CCDC153	1.04158	0.314853	0.157275	3.30816	4.62075	1.91e-06
CCDC122	10.0686	3.46555	1.42933	2.90536	4.61972	1.92e-06
SYP	1.38878	0.461916	0.200725	3.00656	4.61758	1.94e-06
RP11-351I24.3	0.347195	0.083707	0.0570761	4.14774	4.61642	1.95e-06
STXBP3	63.5366	36.852	5.78181	1.7241	4.61527	1.96e-06
FTO-IT1	0.694389	0.227982	0.101123	3.04581	4.61229	1.99e-06
FCHO2	63.1894	36.6898	5.74783	1.72226	4.61037	2.01e-06
DLD	103.117	65.0404	8.26083	1.58543	4.60927	2.02e-06
TMSB4XP8	54.8567	15.8579	8.46006	3.45926	4.60976	2.02e-06
ERMP1	27.7756	13.9529	2.99977	1.99066	4.60791	2.03e-06
ZFP14	10.4158	3.44852	1.51178	3.02038	4.60868	2.03e-06
NADSYN1	14.235	44.7164	6.61377	0.318339	-4.60878	2.03e-06
BTBD6	13.5406	38.4699	5.40965	0.351979	-4.6083	2.03e-06
LARS	264.215	158.339	22.9823	1.66867	4.60688	2.04e-06
ERO1L	145.127	75.8527	15.048	1.91328	4.60359	2.08e-06
PEF1	22.9148	50.6094	6.01753	0.452778	-4.60231	2.09e-06
DNAH12	0.347195	0.0776884	0.0585865	4.46907	4.60014	2.11e-06
PARG	18.0541	12.0303	1.30933	1.50073	4.60071	2.11e-06
SUDS3	67.703	43.7218	5.21502	1.54849	4.59847	2.13e-06
INPPL1	49.3016	125.474	16.5693	0.392923	-4.59719	2.14e-06
GIN1	9.37425	4.50588	1.05959	2.08045	4.5946	2.17e-06
RP11-389C8.3	0.694389	0.201498	0.107287	3.44613	4.59415	2.17e-06
CCDC91	45.8297	24.8961	4.55712	1.84084	4.5936	2.18e-06
PSMB2	43.7465	86.0799	9.21807	0.508208	-4.59244	2.19e-06
AC092614.2	1.38878	0.533326	0.186288	2.604	4.59209	2.19e-06
AC026271.5	8.33267	3.61345	1.02779	2.30602	4.5916	2.2e-06
AVL9	65.6198	34.9457	6.68145	1.87776	4.59093	2.21e-06
MED24	13.5406	40.2393	5.82046	0.336501	-4.58705	2.25e-06
TIGD3	0.347195	0.0701361	0.0603973	4.9503	4.58727	2.25e-06
RP11-613M10.6	2.43036	1.04859	0.301288	2.31775	4.58622	2.26e-06
EMR2	1.73597	0.223941	0.329942	7.75191	4.58272	2.29e-06
GTF2A2	48.2601	30.6654	3.84055	1.57376	4.5813	2.31e-06
WDR83OS	14.9294	62.1291	10.3052	0.240296	-4.58021	2.32e-06
KDM5A	82.9795	55.0879	6.09149	1.50631	4.57878	2.34e-06
ZNF670	4.51353	2.14374	0.517701	2.10545	4.57752	2.35e-06
RBM4	28.8172	57.6312	6.29408	0.500027	-4.57797	2.35e-06
RP11-104N10.1	0.694389	0.195874	0.108895	3.54508	4.57794	2.35e-06
C2orf49	41.6634	25.4546	3.54142	1.63677	4.5769	2.36e-06
CD164	601.341	365.486	51.5421	1.64532	4.57597	2.37e-06
DLG1	143.739	77.3007	14.5257	1.85947	4.57382	2.39e-06
WBSCR16	5.20792	13.2676	1.76224	0.392529	-4.57355	2.4e-06
SRBD1	26.0396	15.6497	2.27221	1.66391	4.57262	2.41e-06
SFPQ	363.166	161.669	44.0647	2.24635	4.57275	2.41e-06
LRIF1	22.9148	11.9705	2.39358	1.91428	4.57238	2.41e-06
MBD2	147.558	79.9062	14.8017	1.84664	4.57053	2.43e-06
EFCAB13	4.86072	1.84745	0.659559	2.63105	4.56862	2.45e-06
PSMD5	74.6468	47.8154	5.87377	1.56115	4.56801	2.46e-06
CTC-281F24.1	0.347195	0.0673058	0.061265	5.15846	4.56849	2.46e-06
ZNF396	2.77756	0.755834	0.442737	3.67482	4.56642	2.48e-06
ATXN3	31.5947	18.3819	2.89376	1.71879	4.56596	2.49e-06
CSF2RB	4.16634	0.34767	0.836378	11.9836	4.56572	2.49e-06
PSD3	184.708	75.1278	24.0181	2.45858	4.56238	2.53e-06
CCDC136	17.7069	7.09057	2.32856	2.49725	4.5592	2.57e-06
CAMK2D	239.911	109.143	28.6931	2.19815	4.5575	2.59e-06
RP11-732A19.2	0.694389	0.219942	0.104137	3.15714	4.55598	2.61e-06
RP11-186N15.3	1.04158	0.321553	0.158163	3.23923	4.55245	2.65e-06
CTC-498J12.3	0.347195	0.0942148	0.0555667	3.68514	4.55272	2.65e-06
RP13-88F20.1	0.694389	0.138286	0.122179	5.02139	4.55153	2.66e-06
THAP9	5.55511	2.78523	0.608735	1.99449	4.55023	2.68e-06
TRIT1	22.2205	12.928	2.04312	1.71878	4.54815	2.71e-06
NTN4	125.684	20.5522	23.1181	6.11539	4.54761	2.71e-06
GNG12	576.69	343.809	51.2212	1.67735	4.54657	2.73e-06
CCDC7	2.43036	1.1342	0.285164	2.14279	4.54531	2.74e-06
DNTTIP2	98.6033	49.1639	10.8799	2.0056	4.54409	2.76e-06
TAF6	12.8462	31.4044	4.08424	0.409057	-4.54386	2.76e-06
POLR3K	12.1518	5.70902	1.41862	2.12853	4.54158	2.79e-06
EIF2S3	276.02	154.709	26.7223	1.78412	4.53967	2.82e-06
COX18	15.2766	9.4076	1.29374	1.62385	4.53645	2.86e-06
KXD1	19.0957	48.8099	6.55314	0.391226	-4.53434	2.89e-06
AC012314.8	1.04158	0.356368	0.151166	2.92278	4.53289	2.91e-06
RP11-707G14.7	0.347195	0.0988787	0.0547847	3.51132	4.53258	2.91e-06
ACAA1	7.98548	26.972	4.19101	0.296066	-4.53029	2.95e-06
FBXO43	2.08317	0.335412	0.385841	6.21078	4.52973	2.95e-06
ETS1	283.311	136.194	32.4859	2.0802	4.52864	2.97e-06
TTC9B	0.347195	0.0750506	0.0601077	4.62614	4.52761	2.98e-06
TBCA	90.965	55.9581	7.73293	1.62559	4.52699	2.99e-06
MLH3	31.2475	14.9815	3.59375	2.08574	4.5262	3e-06
STRADA	6.5967	17.9337	2.50506	0.367838	-4.52565	3.01e-06
CTD-2184D3.6	0.347195	0.0845197	0.0580546	4.10786	4.52462	3.03e-06
ERP44	122.213	80.9885	9.11446	1.50901	4.52292	3.05e-06
RAB27A	52.0792	27.3404	5.46959	1.90484	4.52297	3.05e-06
CX3CR1	1.73597	0.144743	0.351928	11.9935	4.52147	3.07e-06
TRAPPC3	31.9419	49.9616	3.98788	0.639329	-4.51862	3.11e-06
ZNF461	6.94389	3.92861	0.66739	1.76752	4.51802	3.12e-06
RP11-445O16.3	0.347195	0.0982799	0.0551001	3.53271	4.5175	3.13e-06
MTMR1	40.969	21.7028	4.26542	1.88773	4.51683	3.14e-06
SLC35G1	13.5406	6.97104	1.45517	1.94241	4.51461	3.17e-06
TRAK2	184.708	104.851	17.6945	1.76163	4.5131	3.19e-06
MTA3	45.4825	27.509	3.98295	1.65337	4.51261	3.2e-06
PSMB4	62.495	122.251	13.2424	0.511203	-4.51248	3.2e-06
TMCC3	1.38878	0.176677	0.268628	7.86055	4.51219	3.21e-06
PANK2	41.6634	27.3695	3.16913	1.52226	4.51035	3.24e-06
ZNF620	1.38878	0.443939	0.209481	3.12831	4.51039	3.24e-06
HERC3	82.9795	37.0159	10.1943	2.24173	4.50875	3.26e-06
SPESP1	10.0686	2.29572	1.72458	4.38582	4.50715	3.29e-06
CPSF4	7.29109	21.0988	3.06434	0.345569	-4.50595	3.3e-06
EEF1A1P14	0.694389	0.161783	0.118237	4.29212	4.50457	3.33e-06
NRP1	787.785	365.053	93.8777	2.158	4.503	3.35e-06
RP11-195E2.1	1.04158	0.213797	0.183824	4.87183	4.50315	3.35e-06
CHST14	8.67987	36.4189	6.16077	0.238334	-4.50253	3.36e-06
RBM4B	6.94389	14.6445	1.71045	0.474164	-4.50209	3.36e-06
CTDNEP1	49.6488	95.4553	10.1768	0.520126	-4.50107	3.38e-06
XPA	16.6653	8.70931	1.76793	1.91351	4.50019	3.39e-06
GPATCH2L	59.0231	36.6911	4.96343	1.60865	4.49931	3.41e-06
PAQR3	37.8442	21.2996	3.67855	1.77675	4.49759	3.44e-06
OSTC	280.533	175.525	23.3562	1.59825	4.49594	3.46e-06
TMEM120B	4.86072	13.5886	1.94248	0.357706	-4.49317	3.51e-06
DNAJC8P1	0.347195	0.0768448	0.0602446	4.51813	4.48754	3.6e-06
FAM178A	52.4264	27.9641	5.45199	1.87477	4.48685	3.61e-06
TMEM141	4.51353	16.8178	2.74249	0.268378	-4.48653	3.62e-06
AKT2	41.6634	117.189	16.837	0.355524	-4.48568	3.63e-06
PRAF2	9.72145	41.4648	7.07615	0.234451	-4.48596	3.63e-06
SERBP1	446.145	256.86	42.2005	1.73692	4.48538	3.64e-06
SCO2	0.694389	6.85113	1.37282	0.101354	-4.48474	3.65e-06
DPH6	7.63828	4.23148	0.759777	1.80511	4.48395	3.66e-06
CD7	1.38878	0.22276	0.260091	6.23441	4.48311	3.68e-06
TMEM258	12.499	45.1641	7.29101	0.276747	-4.48019	3.73e-06
AP002495.1	0.347195	0.106099	0.0538284	3.27236	4.47896	3.75e-06
RCN2	171.167	104.476	14.8945	1.63834	4.47755	3.78e-06
FHAD1	6.5967	1.27141	1.18961	5.18851	4.47649	3.79e-06
SMIM14	181.93	92.5623	19.9663	1.96549	4.47593	3.8e-06
BRIX1	42.3577	22.873	4.35353	1.85187	4.47562	3.81e-06
CCDC34	19.0957	7.0378	2.69462	2.71331	4.4748	3.82e-06
RP11-256L6.3	1.73597	0.537011	0.267981	3.23266	4.47405	3.84e-06
NUDT15	31.5947	16.5215	3.3694	1.91234	4.47356	3.85e-06
ACBD5	46.1769	29.9686	3.62366	1.54084	4.47291	3.86e-06
PDHB	112.838	66.2247	10.4232	1.70387	4.47208	3.87e-06
CCDC90B	78.1188	49.1179	6.48915	1.59043	4.46914	3.93e-06
LINC01111	0.694389	0.130284	0.126232	5.32981	4.46881	3.93e-06
RHOBTB1	146.516	57.8924	19.8537	2.53083	4.46384	4.03e-06
GABPA	76.3828	43.5539	7.35679	1.75375	4.46239	4.05e-06
HNRNPA2B1	1010.34	456.409	124.143	2.21367	4.46201	4.06e-06
ZC3H14	81.5907	54.1563	6.1495	1.50658	4.46125	4.07e-06
CLPTM1	35.0667	80.9045	10.274	0.433433	-4.46155	4.07e-06
CDK16	34.0251	90.5173	12.6639	0.375896	-4.46087	4.08e-06
HIPK2	76.3828	36.6921	8.89852	2.08172	4.46037	4.09e-06
TWF1	231.926	147.795	18.8667	1.56925	4.45926	4.11e-06
MPHOSPH8	82.9795	51.9844	6.95025	1.59624	4.45956	4.11e-06
RP11-2H3.6	0.347195	0.0878869	0.0581552	3.95047	4.45889	4.12e-06
DCAF11	21.5261	44.5507	5.16523	0.483181	-4.45762	4.14e-06
RASSF8	246.161	111.675	30.1751	2.20427	4.45687	4.16e-06
DNAJB6	184.36	104.467	17.9352	1.76477	4.45454	4.2e-06
NAPB	23.9564	12.0718	2.66782	1.9845	4.45482	4.2e-06
FPGS	9.37425	32.0044	5.0815	0.292905	-4.45343	4.23e-06
APLF	12.1518	5.89932	1.40403	2.05987	4.45324	4.23e-06
SUCLA2-AS1	0.347195	0.0811564	0.0597561	4.27809	4.45207	4.25e-06
JAGN1	9.72145	19.3345	2.1596	0.502803	-4.4513	4.27e-06
NDUFA12	52.7736	26.6063	5.88069	1.9835	4.4497	4.3e-06
GPR126	38.1914	8.29216	6.7248	4.60572	4.44612	4.37e-06
ANXA1	1014.85	458.126	125.212	2.21522	4.44623	4.37e-06
GLUD2	1.73597	0.528732	0.271745	3.28328	4.44255	4.45e-06
WDR26	243.731	155.104	19.9537	1.5714	4.4416	4.46e-06
ERCC3	26.0396	43.4872	3.92809	0.598788	-4.44174	4.46e-06
SKIV2L2	97.9089	60.5372	8.41668	1.61733	4.44019	4.49e-06
HSPA6	0.694389	0.145033	0.123799	4.78782	4.4375	4.55e-06
ERCC1	20.4845	58.0248	8.46024	0.35303	-4.43726	4.56e-06
SRSF10	27.4284	10.7168	3.76684	2.55939	4.4365	4.57e-06
CCDC42B	0.347195	0.0912995	0.0577125	3.80281	4.43397	4.63e-06
STK19	2.77756	10.1616	1.66585	0.27334	-4.43256	4.66e-06
RP11-102M11.1	0.347195	0.0780264	0.060733	4.44971	4.43199	4.67e-06
BRK1	178.111	120.42	13.0192	1.47907	4.43117	4.69e-06
TMEM214	30.2059	97.4035	15.1662	0.310111	-4.43075	4.7e-06
PQLC2	1.04158	10.2285	2.07398	0.101832	-4.42959	4.72e-06
RFXANK	3.81914	17.7882	3.15347	0.2147	-4.42975	4.72e-06
RNF168	30.9003	16.9305	3.15384	1.82513	4.42948	4.72e-06
FSIP1	5.55511	2.09117	0.782133	2.65646	4.42884	4.74e-06
NDUFB11	11.8046	32.8175	4.74696	0.359705	-4.42661	4.79e-06
UQCRH	110.061	72.8454	8.40743	1.51088	4.42648	4.79e-06
CCNG2	130.545	59.8608	15.9736	2.18081	4.42507	4.82e-06
LTN1	61.4534	39.5494	4.95106	1.55384	4.42411	4.84e-06
PI4KB	35.761	70.5223	7.85861	0.507089	-4.42333	4.86e-06
UBE2B	104.158	59.2633	10.1569	1.75755	4.42016	4.93e-06
C14orf119	28.8172	58.8437	6.7929	0.489724	-4.42028	4.93e-06
B4GALT2	28.8172	93.1328	14.5512	0.30942	-4.41997	4.94e-06
RPL23AP64	0.694389	0.213793	0.108737	3.24795	4.41982	4.94e-06
ZMYM4	121.865	74.9116	10.6256	1.62679	4.41894	4.96e-06
MRPL32	45.1353	26.6219	4.19025	1.69542	4.4182	4.98e-06
SKA2	66.6614	28.8443	8.56157	2.31108	4.41707	5e-06
PFDN4	54.1624	27.0933	6.13821	1.99911	4.40993	5.17e-06
MRPL37	22.2205	54.7666	7.38178	0.40573	-4.40899	5.19e-06
UBAC1	11.8046	23.3559	2.62012	0.505423	-4.40868	5.2e-06
NPHP1	11.4574	5.65273	1.31678	2.02688	4.40826	5.21e-06
HINT1	200.331	126.322	16.7909	1.58588	4.40772	5.22e-06
RP4-740C4.9	0.347195	0.0979069	0.0565575	3.54617	4.40769	5.22e-06
DDX52	45.4825	29.249	3.68367	1.55501	4.40689	5.24e-06
NHEJ1	0.347195	3.38172	0.6887	0.102668	-4.40616	5.26e-06
USP33	130.198	76.1866	12.2631	1.70894	4.40437	5.3e-06
RP11-279F6.1	0.347195	0.0799108	0.0606848	4.34478	4.40446	5.3e-06
SLC7A11	305.184	106.127	45.198	2.87565	4.40411	5.31e-06
G6PC3	10.0686	41.3431	7.10255	0.243539	-4.40327	5.33e-06
RP11-267J23.4	0.694389	0.190535	0.114422	3.64443	4.40347	5.33e-06
MPDU1	10.763	32.2569	4.88416	0.333666	-4.40073	5.39e-06
RAB27B	11.8046	1.86416	2.25909	6.33241	4.40021	5.41e-06
MUT	58.6759	35.4061	5.28946	1.65723	4.39927	5.43e-06
RP11-873E20.1	0.694389	0.178868	0.117187	3.88214	4.39914	5.43e-06
SDE2	45.4825	26.2512	4.37203	1.73259	4.39872	5.44e-06
CHMP4A	44.7881	28.4054	3.72434	1.57675	4.39883	5.44e-06
ST13P6	1.38878	0.369601	0.231728	3.7575	4.39817	5.46e-06
FAM19A2	7.63828	1.27309	1.4475	5.99978	4.39736	5.48e-06
CCDC112	15.2766	6.7893	1.93087	2.25009	4.39556	5.52e-06
KAT5	9.72145	19.7297	2.27933	0.492732	-4.39087	5.64e-06
PLCB4	110.061	28.6081	18.5528	3.84719	4.39032	5.66e-06
CCDC144B	8.33267	2.14222	1.4103	3.88973	4.38946	5.68e-06
ZCCHC9	32.9835	20.2486	2.903	1.62893	4.38682	5.75e-06
ACTR1A	64.231	137.475	16.7085	0.46722	-4.38362	5.84e-06
NAA50	222.205	141.754	18.3554	1.56753	4.38293	5.85e-06
TEX264	9.37425	29.005	4.47936	0.323195	-4.38248	5.87e-06
RNU6-36P	0.347195	0.0878956	0.0592059	3.95008	4.37962	5.94e-06
ARIH1	90.2706	61.6849	6.52875	1.46341	4.37843	5.98e-06
ARAF	14.5822	39.625	5.72021	0.368005	-4.37795	5.99e-06
AP001372.2	5.90231	2.663	0.739891	2.21641	4.37809	5.99e-06
ZNF34	0.347195	3.31056	0.677456	0.104875	-4.37426	6.09e-06
KDELR1	80.8963	174.868	21.4966	0.462613	-4.37147	6.17e-06
ATAD1	98.9505	61.9153	8.47231	1.59816	4.37132	6.17e-06
ASNA1	19.4429	53.1533	7.71293	0.365789	-4.37063	6.19e-06
ZNF486	12.1518	6.14723	1.37412	1.97679	4.36977	6.22e-06
EFCAB11	8.67987	4.39883	0.980012	1.97322	4.36836	6.26e-06
UQCR10	14.5822	37.4048	5.22523	0.389847	-4.36778	6.28e-06
TMEM256-PLSCR3	18.0541	53.0173	8.00843	0.340533	-4.3658	6.33e-06
NPRL2	3.47195	9.97579	1.49073	0.348037	-4.36285	6.42e-06
LARP4	81.2435	45.1038	8.28728	1.80126	4.36087	6.48e-06
ARL1	184.708	118.218	15.2485	1.56244	4.36043	6.49e-06
SMARCAL1	13.5406	26.1309	2.89007	0.518183	-4.35641	6.61e-06
TGFBR1	374.276	169.73	46.9614	2.20513	4.35562	6.63e-06
DDX28	1.73597	6.49696	1.09331	0.267198	-4.35466	6.66e-06
CDK5	2.08317	9.76081	1.76344	0.213422	-4.35377	6.69e-06
APOOL	6.5967	3.54328	0.7015	1.86175	4.3527	6.72e-06
CERS6	34.0251	17.7051	3.7497	1.92177	4.35235	6.73e-06
TMEM256	1.38878	9.89236	1.95464	0.140389	-4.35046	6.79e-06
C16orf46	1.73597	0.855372	0.202438	2.0295	4.34998	6.81e-06
USP6	1.04158	0.342659	0.16081	3.03971	4.34627	6.92e-06
CTC-332L22.1	0.694389	0.204431	0.11273	3.3967	4.34629	6.92e-06
CRNDE	36.4554	18.3326	4.17074	1.98856	4.34523	6.96e-06
NAPSA	0.694389	0.189548	0.116271	3.66339	4.34194	7.06e-06
FKBP3	77.4244	38.3811	8.99393	2.01725	4.34107	7.09e-06
C7orf25	21.5261	14.4615	1.62736	1.48851	4.34112	7.09e-06
RPL27A	276.367	617.054	78.4834	0.447881	-4.34088	7.1e-06
NPLOC4	51.0376	102.276	11.806	0.499019	-4.34002	7.12e-06
SPR	17.7069	9.41125	1.91252	1.88146	4.33755	7.2e-06
MBD1	24.6508	46.9686	5.1458	0.524836	-4.33708	7.22e-06
CTD-2286N8.2	1.04158	0.396239	0.148826	2.62868	4.33624	7.25e-06
AGBL3	1.04158	0.449886	0.136467	2.31522	4.33584	7.26e-06
RP11-831H9.3	0.347195	0.0842938	0.0606372	4.11886	4.33563	7.27e-06
GPN3	23.6092	13.8103	2.26032	1.70953	4.33519	7.28e-06
ZFC3H1	83.3267	41.9121	9.55474	1.98813	4.33446	7.31e-06
FAM103A1	17.0125	11.4207	1.29011	1.48963	4.3344	7.31e-06
HCG20	0.347195	0.0770046	0.0623361	4.50875	4.33441	7.31e-06
SUMO3	150.335	99.6694	11.69	1.50834	4.3341	7.32e-06
SWI5	7.63828	18.4936	2.50595	0.413024	-4.3318	7.39e-06
FAM73A	32.9835	19.9727	3.00339	1.65143	4.33202	7.39e-06
CPEB2	62.495	27.0322	8.18761	2.31187	4.33127	7.41e-06
RNF216P1	5.55511	15.153	2.21589	0.366601	-4.33141	7.41e-06
CTD-2331H12.7	0.347195	0.0956028	0.0580884	3.63164	4.33119	7.42e-06
CCDC132	34.7195	21.0486	3.15749	1.64949	4.32965	7.47e-06
ZNF446	1.38878	6.45635	1.17116	0.215103	-4.32698	7.56e-06
THAP4	12.499	32.0923	4.52911	0.38947	-4.32608	7.59e-06
BMI1	108.672	68.0008	9.40345	1.5981	4.32512	7.62e-06
AKR1A1	19.7901	47.5129	6.41408	0.41652	-4.32218	7.72e-06
CCDC117	53.1208	32.8159	4.70166	1.61875	4.31867	7.85e-06
TMEM203	10.763	24.4655	3.17367	0.439927	-4.31755	7.89e-06
FAM205A	0.347195	0.0769632	0.0625992	4.51118	4.31685	7.91e-06
ATP2B1	233.315	107.583	29.1283	2.1687	4.3165	7.93e-06
C6orf195	0.347195	0.0877401	0.0601123	3.95708	4.31617	7.94e-06
SARNP	68.0501	38.053	6.95059	1.7883	4.31576	7.95e-06
NDUFS3	12.8462	27.6831	3.43941	0.464045	-4.3138	8.02e-06
MIOS	31.2475	17.3604	3.21968	1.79993	4.31321	8.05e-06
RP11-74E22.3	0.347195	0.0931308	0.0589233	3.72803	4.31177	8.1e-06
MIR17HG	1.04158	0.305513	0.170765	3.4093	4.31044	8.15e-06
DLGAP1-AS2	4.51353	1.79783	0.630061	2.51055	4.31023	8.15e-06
HSPB11	22.5677	11.7146	2.51855	1.92646	4.30925	8.19e-06
C19orf47	1.73597	7.70774	1.3859	0.225225	-4.30896	8.2e-06
HNRNPR	274.631	143.182	30.5081	1.91805	4.30866	8.21e-06
GPS1	15.971	49.79	7.84948	0.320767	-4.30844	8.22e-06
ZNF772	14.9294	6.76161	1.89587	2.20796	4.30817	8.23e-06
BIRC2	132.976	80.428	12.1995	1.65335	4.30734	8.26e-06
ZNF142	6.2495	16.3488	2.34558	0.38226	-4.30567	8.32e-06
AC084219.4	3.47195	1.50125	0.457792	2.31271	4.30479	8.36e-06
GNB2L1	365.943	896.498	123.269	0.408192	-4.30405	8.39e-06
HESX1	1.04158	0.376849	0.154465	2.76393	4.30347	8.41e-06
CISD2	36.8026	23.5587	3.07876	1.56217	4.3017	8.47e-06
MED13	121.518	77.5127	10.2344	1.56772	4.29976	8.55e-06
RP11-520D19.2	0.347195	0.0841568	0.0611827	4.12557	4.29922	8.57e-06
DNAJC10	289.56	175.148	26.6303	1.65324	4.29634	8.68e-06
ATF1	45.4825	25.7742	4.5872	1.76465	4.29635	8.68e-06
ZNF345	5.55511	2.49435	0.712697	2.22708	4.29463	8.75e-06
AHCY	36.8026	90.1163	12.417	0.408391	-4.29359	8.79e-06
GTF3C2	13.5406	34.457	4.8725	0.39297	-4.29275	8.82e-06
PTGES3	313.17	190.347	28.616	1.64526	4.29208	8.85e-06
CMTM6	182.972	115.599	15.7003	1.58282	4.2912	8.89e-06
H3F3AP6	1.38878	0.347991	0.242565	3.99085	4.29076	8.9e-06
KLHL28	36.8026	19.0303	4.14287	1.9339	4.28987	8.94e-06
SDHDP2	0	2.03178	0.47391	0	-4.28727	9.04e-06
P4HA1	541.624	267.873	63.8702	2.02194	4.28604	9.09e-06
APEX2	3.12475	14.199	2.5846	0.220069	-4.2847	9.15e-06
HNRNPA3P6	3.12475	0.846019	0.532244	3.69348	4.28137	9.29e-06
ARAP1-AS2	0.694389	0.174409	0.121459	3.98138	4.28112	9.3e-06
G3BP1	261.438	158.065	24.1549	1.65398	4.27955	9.36e-06
MAN1A1	337.82	120.872	50.7007	2.79485	4.27899	9.39e-06
GTPBP8	15.6238	10.0483	1.30395	1.55486	4.27581	9.52e-06
B4GALT7	4.16634	18.9829	3.46527	0.219478	-4.27573	9.53e-06
PTAR1	75.3412	44.4991	7.2134	1.6931	4.27567	9.53e-06
SEH1L	56.5927	32.7898	5.5673	1.72592	4.27548	9.54e-06
RALGPS2	119.088	48.5792	16.5042	2.45141	4.27215	9.68e-06
DPY19L1	116.657	65.1585	12.0548	1.79036	4.27206	9.68e-06
LIMA1	1229.07	584.039	150.995	2.10443	4.27186	9.69e-06
HHIPL2	1.38878	0.288859	0.257545	4.80781	4.2708	9.74e-06
DCK	47.9129	21.6661	6.14797	2.21142	4.26918	9.81e-06
CMC1	14.9294	8.66959	1.4663	1.72204	4.2691	9.81e-06
DOLK	8.67987	22.8017	3.30899	0.380668	-4.26771	9.87e-06
IFT57	68.3973	38.4038	7.03417	1.781	4.26397	1e-05
GSK3B	152.766	95.8076	13.3642	1.5945	4.26198	1.01e-05
RAB11FIP2	169.084	63.9519	24.6663	2.64392	4.26217	1.01e-05
SGK3	21.1789	11.6907	2.22751	1.8116	4.25954	1.02e-05
MECR	6.5967	15.4117	2.06998	0.428032	-4.2585	1.03e-05
BSCL2	9.37425	31.8112	5.26847	0.294684	-4.25873	1.03e-05
DYNLL2	129.156	79.3419	11.7038	1.62785	4.25625	1.04e-05
ARFGEF1	106.242	67.4279	9.12996	1.57563	4.25124	1.06e-05
ACOT8	2.77756	9.42814	1.5644	0.294603	-4.2512	1.06e-05
CHMP3	201.373	139.712	14.4994	1.44134	4.25261	1.06e-05
CLIP1	278.797	155.332	29.0699	1.79484	4.24717	1.08e-05
ABCC10	5.20792	20.3413	3.56541	0.256027	-4.24449	1.1e-05
GNG10	82.9795	47.623	8.33058	1.74242	4.24418	1.1e-05
CEP85L	35.761	18.8897	3.97938	1.89315	4.23969	1.12e-05
MOGS	18.7485	49.0258	7.14477	0.382421	-4.23769	1.13e-05
DCUN1D5	49.6488	28.0143	5.10515	1.77227	4.23779	1.13e-05
GPBP1L1	105.2	69.1144	8.51516	1.52211	4.2378	1.13e-05
RC3H2	121.518	71.7043	11.7632	1.69471	4.23471	1.14e-05
ACTA1	0.347195	0.0853173	0.0618372	4.06945	4.23495	1.14e-05
ABCA12	0.347195	0.0871431	0.0613994	3.98419	4.23541	1.14e-05
ELP5	11.8046	21.944	2.39538	0.537943	-4.23288	1.15e-05
CTD-2515A14.1	0.347195	0.0738004	0.0645723	4.70451	4.23392	1.15e-05
IL17RB	5.90231	2.19436	0.876378	2.68976	4.23099	1.16e-05
WDR12	45.4825	26.1839	4.55972	1.73704	4.23241	1.16e-05
CTD-3193K9.3	0.347195	0.0889117	0.0610573	3.90494	4.23017	1.17e-05
EXOC5	130.198	86.6306	10.3047	1.50291	4.22791	1.18e-05
DENND4A	44.7881	26.604	4.30165	1.68351	4.22724	1.18e-05
FBXL12	7.29109	17.6224	2.44526	0.413741	-4.22501	1.19e-05
FAM96B	11.1102	29.5466	4.3623	0.376023	-4.2263	1.19e-05
EXOC8	26.0396	15.401	2.5191	1.69077	4.22317	1.2e-05
PGRMC2	515.931	243.46	64.5155	2.11916	4.22335	1.2e-05
GPR64	1.04158	0.369084	0.159233	2.82208	4.22337	1.2e-05
SHOC2	123.601	78.0096	10.805	1.58444	4.21948	1.22e-05
BLOC1S1	15.971	35.3481	4.59105	0.45182	-4.22062	1.22e-05
WDR45	16.3181	49.1378	7.77606	0.332089	-4.22061	1.22e-05
URI1	102.77	70.3445	7.68595	1.46095	4.21875	1.23e-05
PGLS	12.499	42.1863	7.03857	0.296281	-4.2178	1.23e-05
C11orf49	8.67987	19.8245	2.64204	0.437835	-4.21821	1.23e-05
ZDHHC20	44.4409	25.8785	4.40185	1.71729	4.21696	1.24e-05
CCSER2	110.061	70.9115	9.29256	1.55209	4.21296	1.26e-05
CBX1	147.558	80.5158	15.9158	1.83266	4.21229	1.26e-05
PAF1	71.8693	41.7349	7.15486	1.72204	4.21174	1.27e-05
MOSPD2	69.4389	35.5445	8.05075	1.95358	4.2101	1.28e-05
LDHB	450.659	262.901	44.6237	1.71418	4.20758	1.29e-05
DNAJB4	130.198	51.5089	18.6985	2.52768	4.20831	1.29e-05
NAP1L4	128.462	79.9058	11.5388	1.60767	4.20808	1.29e-05
BCKDHA	3.47195	12.9841	2.26034	0.267399	-4.20831	1.29e-05
FAM20B	168.389	93.7168	17.7576	1.79679	4.2051	1.3e-05
ZC2HC1A	34.3723	19.6142	3.511	1.75241	4.20337	1.31e-05
TROVE2	46.8713	32.4925	3.4199	1.44253	4.20445	1.31e-05
SUOX	4.51353	11.4492	1.64946	0.394223	-4.2048	1.31e-05
NCKAP1	408.995	275.072	31.8731	1.48687	4.20175	1.32e-05
ZC3H6	21.5261	9.73335	2.80632	2.21158	4.20221	1.32e-05
TOMM70A	117.352	71.4821	10.9199	1.64169	4.20057	1.33e-05
PHKG2	3.81914	11.4072	1.80666	0.334799	-4.20007	1.33e-05
PMS2P3	5.20792	2.60523	0.619741	1.99903	4.19965	1.34e-05
ARL6IP4	89.9234	60.6006	6.98191	1.48387	4.19983	1.34e-05
MKNK1-AS1	0.347195	0.0735876	0.0651516	4.71811	4.19954	1.34e-05
MITD1	24.3036	13.3423	2.61186	1.82154	4.19675	1.35e-05
CTC-303L1.2	0.347195	0.0794247	0.0638269	4.37137	4.19525	1.36e-05
MIR568	1.38878	0.482545	0.216057	2.87803	4.19441	1.37e-05
CTD-2033A16.2	1.73597	0.499888	0.294959	3.47272	4.1907	1.39e-05
RP11-524D16__A.3	3.47195	1.16892	0.549511	2.97022	4.19105	1.39e-05
NUDT17	0	2.09566	0.500841	0	-4.18427	1.43e-05
CTNNBIP1	6.2495	17.7323	2.74479	0.352437	-4.18348	1.44e-05
TP53BP1	115.616	74.1842	9.90987	1.5585	4.18084	1.45e-05
RNF144B	32.6363	7.69974	5.96487	4.23862	4.18057	1.45e-05
SCP2	157.279	99.345	13.8635	1.58316	4.1789	1.46e-05
SLC35C2	14.235	38.7566	5.8715	0.367291	-4.17639	1.48e-05
CD79A	0.694389	0.154277	0.129307	4.50094	4.17696	1.48e-05
SIRT2	19.7901	47.9522	6.74632	0.412705	-4.17443	1.49e-05
CLEC11A	94.7841	34.3736	14.4715	2.75747	4.17446	1.49e-05
AASDHPPT	52.7736	32.9081	4.75766	1.60367	4.17548	1.49e-05
SP2	5.20792	15.6637	2.50479	0.332482	-4.17432	1.49e-05
FAM221A	1.04158	0.280834	0.182194	3.70889	4.17549	1.49e-05
SH3RF1	92.701	41.5415	12.2588	2.23152	4.17329	1.5e-05
HCG27	0.694389	0.143045	0.132164	4.85435	4.17168	1.51e-05
TTC32	6.5967	2.63893	0.948841	2.49977	4.17116	1.52e-05
UBA52	134.364	307.88	41.6124	0.436417	-4.16981	1.52e-05
TCEB1P19	0.694389	0.215645	0.114789	3.22006	4.17066	1.52e-05
METAP2	170.125	103.506	15.9894	1.64362	4.16644	1.55e-05
MRPL2	6.2495	14.2574	1.92259	0.438333	-4.16518	1.56e-05
HYPK	4.86072	1.69796	0.759392	2.86269	4.16487	1.56e-05
CLPB	2.43036	8.17908	1.38163	0.297144	-4.16082	1.59e-05
TC2N	2.43036	0.715956	0.412232	3.39457	4.15883	1.6e-05
AAGAB	67.703	47.4909	4.86124	1.4256	4.1578	1.61e-05
RPS4XP17	0.347195	0.083055	0.0635434	4.1803	4.15684	1.61e-05
LYRM7	33.3307	18.72	3.51551	1.78048	4.15606	1.62e-05
TNPO1	297.199	186.081	26.7701	1.59714	4.1508	1.66e-05
ZNF552	4.51353	2.22713	0.550977	2.02661	4.14972	1.66e-05
RP11-108L7.15	0.694389	0.188084	0.122092	3.69191	4.1469	1.69e-05
OTUB1	18.4013	44.7997	6.36974	0.410746	-4.14434	1.7e-05
CTB-58E17.9	0.347195	0.0708881	0.0666555	4.89778	4.14529	1.7e-05
CBLL1	34.7195	21.1354	3.27868	1.64272	4.14316	1.71e-05
NOP10	23.9564	56.1621	7.77402	0.426558	-4.14273	1.72e-05
SAFB2	44.7881	22.7718	5.32156	1.96683	4.1372	1.76e-05
HNRNPDL	351.361	198.948	36.851	1.7661	4.13593	1.77e-05
TCEB2	15.971	73.2923	13.8635	0.217908	-4.13469	1.78e-05
KLHL22	11.8046	25.4319	3.29667	0.464165	-4.13366	1.79e-05
RP11-415F23.3	0.347195	0.0952247	0.0609595	3.64606	4.1334	1.79e-05
SLAIN2	95.4785	64.8125	7.42264	1.47315	4.13142	1.8e-05
ABCE1	180.194	100.707	19.2358	1.78929	4.13225	1.8e-05
PAK2	164.223	109.032	13.3564	1.50619	4.13213	1.8e-05
BCAT2	3.12475	16.3319	3.19754	0.191328	-4.13041	1.81e-05
IK	141.655	82.8372	14.2416	1.71005	4.13004	1.81e-05
AK2	123.948	81.1517	10.3635	1.52737	4.12957	1.82e-05
RP1-95L4.4	1.73597	0.740044	0.241204	2.34577	4.12899	1.82e-05
RPL4P3	0.694389	0.159948	0.12941	4.34133	4.12984	1.82e-05
KIAA1715	115.616	67.1507	11.7397	1.72174	4.12832	1.83e-05
TRIM23	32.9835	17.6079	3.72919	1.87322	4.12303	1.87e-05
BET1L	22.5677	65.4135	10.3962	0.345	-4.12128	1.88e-05
RP11-171I2.4	0.347195	0.0874574	0.0630625	3.96987	4.11873	1.9e-05
SNAPC5	16.6653	10.4107	1.51883	1.60078	4.11803	1.91e-05
STK16	10.4158	20.814	2.52667	0.500426	-4.11535	1.93e-05
ZNF593	0	1.38573	0.336809	0	-4.11431	1.94e-05
MCAT	2.77756	6.57558	0.923617	0.422405	-4.11212	1.96e-05
TPT1-AS1	1.04158	5.5025	1.08489	0.189293	-4.11184	1.96e-05
WDR3	63.1894	36.1836	6.56844	1.74636	4.11146	1.97e-05
CAMSAP2	128.115	86.0108	10.2417	1.48952	4.11103	1.97e-05
AP5S1	3.12475	9.04081	1.43894	0.345627	-4.11141	1.97e-05
SSUH2	0.347195	0.0884276	0.062964	3.92631	4.10976	1.98e-05
C16orf58	23.262	56.5458	8.11347	0.411384	-4.10229	2.05e-05
ANKRD28	189.568	100.947	21.6037	1.8779	4.10213	2.05e-05
PSMB5	40.969	99.4374	14.26	0.412008	-4.10018	2.06e-05
ALOX5AP	1.04158	0.227394	0.198632	4.58052	4.09897	2.07e-05
ZNF292	55.5511	32.4937	5.62778	1.7096	4.09707	2.09e-05
CXorf40B	6.5967	16.8757	2.50894	0.390899	-4.09695	2.09e-05
KLHL7	67.703	41.8295	6.31899	1.61855	4.09455	2.11e-05
TAF2	55.8983	38.0314	4.36564	1.46979	4.09262	2.13e-05
PSMD12	91.3122	51.1426	9.81419	1.78544	4.09301	2.13e-05
TST	0.347195	9.25768	2.17745	0.0375034	-4.09216	2.14e-05
RP11-267N12.3	1.04158	0.382045	0.161203	2.72634	4.09137	2.14e-05
C2CD5	51.732	28.7428	5.62189	1.79982	4.08922	2.16e-05
RPP14	33.6779	23.1361	2.578	1.45564	4.08914	2.16e-05
RP5-1109J22.1	0.347195	0.0764582	0.0662051	4.54098	4.08936	2.16e-05
NMI	28.8172	12.9656	3.87749	2.22259	4.0881	2.17e-05
SSR4	43.3993	110.417	16.3919	0.393049	-4.08847	2.17e-05
UBE2V1	197.207	136.378	14.8762	1.44602	4.08896	2.17e-05
COPS7A	41.6634	79.0152	9.13744	0.527283	-4.08778	2.18e-05
ATP2C1	189.221	120.934	16.7124	1.56466	4.086	2.19e-05
AC133528.2	0.347195	2.47102	0.519675	0.140506	-4.08684	2.19e-05
RP11-354M20.3	0.347195	0.0842442	0.0643431	4.12129	4.08669	2.19e-05
PSG4	223.941	35.0022	46.2577	6.3979	4.08447	2.21e-05
AC002480.5	0.347195	0.0730408	0.0671496	4.75343	4.08273	2.23e-05
ZNF451	51.732	32.2567	4.77139	1.60376	4.08169	2.24e-05
TBC1D25	7.29109	15.5581	2.02632	0.468637	-4.07982	2.25e-05
RNF181	17.0125	36.234	4.71132	0.469518	-4.07985	2.25e-05
ATL3	287.13	161.599	30.7649	1.7768	4.08032	2.25e-05
RP11-103G8.2	0	0.669787	0.164173	0	-4.07975	2.25e-05
F13A1	1.04158	0.171148	0.213365	6.08588	4.07956	2.26e-05
RP1-37N7.3	0.347195	0.082718	0.0648543	4.19733	4.07801	2.27e-05
KIT	109.713	26.1169	20.5018	4.20086	4.07752	2.28e-05
CENPBD1P1	15.6238	35.8825	4.96851	0.435414	-4.07744	2.28e-05
TTC31	9.02706	20.8304	2.8963	0.43336	-4.07532	2.3e-05
ZEB2	212.136	110.673	24.901	1.91678	4.07464	2.3e-05
ZC3H4	38.1914	20.7717	4.27558	1.83863	4.07424	2.31e-05
ACSF3	4.86072	12.3999	1.85165	0.391998	-4.07159	2.33e-05
IPMK	31.5947	14.195	4.27376	2.22577	4.07129	2.34e-05
HCST	1.38878	0.497491	0.218983	2.79157	4.07012	2.35e-05
C1orf50	3.12475	5.70252	0.633279	0.54796	-4.07051	2.35e-05
MZT1	34.7195	15.8814	4.63027	2.18618	4.06847	2.37e-05
SOS1-IT1	1.04158	0.408216	0.155692	2.55155	4.0681	2.37e-05
ESYT3	3.47195	0.991566	0.610131	3.50148	4.06533	2.4e-05
CDC42SE2	31.2475	19.3791	2.92155	1.61243	4.06236	2.43e-05
PLOD2	660.017	243.679	102.532	2.70855	4.06057	2.45e-05
BPTF	103.464	62.4989	10.0892	1.65545	4.06028	2.45e-05
CCDC126	13.8878	7.41452	1.59514	1.87305	4.05812	2.47e-05
UBE2G1	76.73	55.0258	5.34911	1.39444	4.05753	2.48e-05
GEMIN6	13.8878	8.05729	1.43696	1.72363	4.05754	2.48e-05
RNF25	8.33267	18.3779	2.47582	0.453407	-4.05733	2.48e-05
SEC61A1	302.407	621.84	78.7459	0.48631	-4.05651	2.49e-05
SEMA4D	4.16634	1.22599	0.72507	3.39834	4.05526	2.5e-05
EIF4E2	104.158	72.9876	7.68729	1.42707	4.05485	2.51e-05
FLAD1	6.5967	14.6194	1.97872	0.45123	-4.05449	2.51e-05
NUDT21	174.639	102.725	17.7356	1.70006	4.05479	2.51e-05
PIGO	4.51353	16.0258	2.84045	0.281641	-4.05298	2.53e-05
OPTN	257.271	142.976	28.2095	1.7994	4.05166	2.54e-05
MCUR1	46.8713	31.6648	3.75426	1.48023	4.05044	2.56e-05
STX6	80.202	48.8339	7.75192	1.64234	4.04649	2.6e-05
COX14	3.47195	12.6261	2.26223	0.274981	-4.04653	2.6e-05
ZNF90	2.43036	0.928386	0.371277	2.61784	4.04544	2.61e-05
ASUN	41.3162	22.6738	4.6105	1.8222	4.04346	2.63e-05
SMARCB1	18.7485	43.248	6.0585	0.433512	-4.04381	2.63e-05
C11orf74	18.4013	10.5003	1.95396	1.75246	4.04359	2.63e-05
KATNAL1	78.466	41.9697	9.02731	1.86959	4.04288	2.64e-05
METTL23	6.2495	15.2224	2.21932	0.410546	-4.04308	2.64e-05
FAM208A	108.672	64.3039	10.9767	1.68997	4.04204	2.65e-05
IGIP	22.9148	11.3631	2.85818	2.01659	4.04163	2.65e-05
KIAA0556	11.4574	22.0001	2.60861	0.520789	-4.0415	2.66e-05
ZFYVE19	5.20792	14.623	2.32961	0.356146	-4.04149	2.66e-05
TRAF3IP3	1.73597	0.524314	0.299936	3.31094	4.03973	2.68e-05
NBN	85.7571	48.4885	9.2282	1.7686	4.03855	2.69e-05
[truncated: 17,215 more rows]
